# Supplementary material for: Size distribution of nanoplastics and tyre wear particles in human tonsils
Source: Research Square preprint supplement (doi:10.21203/rs.3.rs-6154338/v1), 2025-03-31
Supplement: Supplementary file 1 [file 33dbf16672a02b4ab6900b7d.docx]

Supplementary information:

Size distribution of nanoplastics and tyre wear particles in human tonsils

Dušan Materić1†*, Vaishnavi Rao Tokla1†, Tommy Cedervall2,3, Rupert Holzinger4, Mikael T. Ekvall2,3, Maria Värendh5,6*

1 Helmholtz Centre for Environmental Research – UFZ, Department of Analytical Chemistry, Leipzig, Germany

2 NanoLund, Lund University, Lund, Sweden

3 Biochemistry and Structural Biology, Department of Chemistry, Lund University, Lund, Sweden

4 Institute for Marine and Atmospheric Research Utrecht, Utrecht University, Princetonplein 5, 3584CC Utrecht, the Netherlands

5 School of Medical sciences, Faculty of Medicine and health, Örebro University and Dept. of Otorhinolaryngology, Örebro University hospital, Sweden

6Lund University, Department of Clinical Sciences Lund, Otorhinolaryngology, Head and Neck Surgery, Lund, Sweden

†Equal contribution

*Corresponding author: [dusan.materic@ufz.de](mailto:dusan.materic@ufz.de) & [maria.varendh@med.lu.se](mailto:maria.varendh@med.lu.se)

Table S1: The plastic polymer values and the standard deviation of ng/mg of tonsils for all the filter replicas analyzed for each tonsil.

|  |  | Plastic polymer (ng/mg) | | | | | | | | | | | |  |  |
| --- | --- | --- | --- | --- | --- | --- | --- | --- | --- | --- | --- | --- | --- | --- | --- |
| Sample  Nr. | **Size groups** | **Tyre** | **SD** | **PET** | **SD** | **PS** | **SD** | **PVC** | **SD** | **PP/PPC** | **SD** | **PE** | **SD** | **Total**  **Plastics** | **SD*** |
| 1 | **20-200 nm** | 305 | 113 | 90 | 40 | 74 | 39 | 208 | 79 | 153 | 134 | 249 | 219 | 1079 | 297 |
| **200-1200 nm** | 76 | 16 | 17 | 5 | 20 | 5 | 48 | 11 | 0 | 0 | 0 | 0 | 161 | 21 |
| **1.2-2.7μm** | 0 | 0 | 0 | 0 | 0 | 0 | 0 | 0 | 0 | 0 | 0 | 0 | 0 | 0 |
| **>2.7μm** | 501 | 33 | 152 | 14 | 149 | 8 | 358 | 35 | 0 | 0 | 0 | 0 | 1160 | 51 |
| 2 | **20-200 nm** | 0 | 0 | 0 | 0 | 20 | 10 | 23 | 22 | 27 | 29 | 36 | 39 | 106 | 54 |
| **200-1200 nm** | 0 | 0 | 0 | 0 | 7 | 0 | 0 | 0 | 0 | 0 | 0 | 0 | 7 | 0 |
| **1.2-2.7 μm** | 0 | 0 | 0 | 0 | 0 | 0 | 0 | 0 | 0 | 0 | 0 | 0 | 0 | 0 |
| **>2.7 μm** | 0 | 0 | 0 | 0 | 0 | 0 | 68 | 59 | 92 | 6 | 161 | 30 | 321 | 67 |
| 3 | **20-200 nm** | 0 | 0 | 54 | 0 | 49 | 0 | 0 | 0 | 0 | 0 | 0 | 0 | 103 | 0 |
| **200-1200 nm** | 52 | 15 | 32 | 11 | 33 | 9 | 0 | 0 | 0 | 0 | 0 | 0 | 117 | 20 |
| **1.2-2.7 μm** | 0 | 0 | 0 | 0 | 0 | 0 | 0 | 0 | 0 | 0 | 0 | 0 | 0 | 0 |
| **>2.7 μm** | 0 | 0 | 44 | 0 | 29 | 0 | 0 | 0 | 0 | 0 | 0 | 0 | 73 | 0 |
| 4 | **20-200 nm** | 60 | 84 | 65 | 34 | 25 | 0 | 0 | 0 | 0 | 0 | 0 | 0 | 150 | 91 |
| **200-1200 nm** | 575 | 90 | 197 | 24 | 181 | 34 | 438 | 63 | 0 | 0 | 0 | 0 | 1391 | 117 |
| **1.2-2.7 μm** | 153 | 47 | 145 | 18 | 0 | 0 | 61 | 105 | 95 | 38 | 162 | 45 | 618 | 131 |
| **>2.7 μm** | 847 | 466 | 332 | 284 | 277 | 257 | 509 | 443 | 174 | 302 | 262 | 455 | 2403 | 926 |
| 5 | **20-200 nm** | 26 | 45 | 58 | 22 | 5 | 7 | 0 | 0 | 0 | 0 | 0 | 0 | 90 | 51 |
| **200-1200 nm** | 0 | 0 | 63 | 19 | 0 | 0 | 0 | 0 | 0 | 0 | 0 | 0 | 63 | 19 |
| **1.2-2.7 μm** | 125 | 77 | 72 | 67 | 19 | 32 | 99 | 61 | 0 | 0 | 0 | 0 | 315 | 123 |
| **>2.7 μm** | 1806 | 604 | 775 | 346 | 524 | 197 | 692 | 1198 | 0 | 0 | 0 | 0 | 3797 | 1399 |
| 6 | **20-200 nm** | 269 | 233 | 97 | 24 | 78 | 8 | 0 | 0 | 332 | 61 | 475 | 95 | 1251 | 260 |
| **200-1200 nm** | 5 | 8 | 5 | 1 | 1 | 1 | 0 | 0 | 0 | 0 | 0 | 0 | 10 | 8 |
| **1.2-2.7 μm** | 0 | 0 | 0 | 0 | 0 | 0 | 0 | 0 | 0 | 0 | 0 | 0 | 0 | 0 |
| **>2.7 μm** | 254 | 53 | 95 | 26 | 84 | 32 | 0 | 0 | 117 | 20 | 173 | 29 | 723 | 76 |
| 7 | **20-200 nm** | 321 | 64 | 163 | 24 | 214 | 42 | 385 | 58 | 88 | 39 | 244 | 56 | 1415 | 120 |
| **200-1200 nm** | 55 | 14 | 31 | 10 | 25 | 8 | 0 | 0 | 26 | 13 | 14 | 25 | 151 | 34 |
| **1.2-2.7 μm** | 0 | 0 | 0 | 0 | 7 | 7 | 0 | 0 | 0 | 0 | 0 | 0 | 7 | 7 |
| **>2.7 μm** | 3048 | 19 | 1544 | 34 | 1797 | 129 | 2571 | 20 | 505 | 25 | 0 | 0 | 9465 | 138 |
| 8 | **20-200 nm** | 272 | 57 | 87 | 19 | 81 | 16 | 237 | 54 | 0 | 0 | 0 | 0 | 676 | 83 |
| **200-1200 nm** | 0 | 0 | 40 | 19 | 15 | 7 | 0 | 0 | 0 | 0 | 0 | 0 | 55 | 20 |
| **1.2-2.7 μm** | 0 | 0 | 30 | 51 | 0 | 0 | 0 | 0 | 0 | 0 | 0 | 0 | 30 | 51 |
| **>2.7 μm** | 565 | 35 | 162 | 5 | 189 | 16 | 527 | 49 | 0 | 0 | 0 | 0 | 1443 | 63 |
| 9 | **20-200 nm** | 66 | 1 | 0 | 0 | 18 | 11 | 42 | 37 | 0 | 0 | 0 | 0 | 126 | 39 |
| **200-1200 nm** | 13 | 11 | 0 | 0 | 6 | 5 | 8 | 13 | 0 | 0 | 0 | 0 | 27 | 18 |
| **1.2-2.7 μm** | 0 | 0 | 0 | 0 | 3 | 6 | 0 | 0 | 0 | 0 | 0 | 0 | 3 | 6 |
| **>2.7 μm** | 1196 | 680 | 0 | 0 | 744 | 425 | 1076 | 606 | 0 | 0 | 0 | 0 | 3016 | 1005 |
| 10 | **20-200 nm** | 20 | 18 | 8 | 14 | 9 | 5 | 0 | 0 | 14 | 23 | 19 | 32 | 70 | 46 |
| **200-1200 nm** | 35 | 7 | 14 | 7 | 8 | 7 | 0 | 0 | 25 | 7 | 27 | 25 | 108 | 28 |
| **1.2-2.7 μm** | 204 | 168 | 47 | 81 | 61 | 35 | 77 | 134 | 31 | 54 | 60 | 105 | 481 | 261 |
| **>2.7 μm** | 1794 | 72 | 902 | 82 | 759 | 10 | 2128 | 92 | 648 | 9 | 1665 | 124 | 7896 | 189 |
| 11 | **20-200 nm** | 23 | 0 | 0 | 0 | 14 | 2 | 0 | 0 | 0 | 0 | 0 | 0 | 37 | 2 |
| **200-1200 nm** | 42 | 3 | 32 | 15 | 17 | 8 | 0 | 0 | 12 | 10 | 10 | 18 | 113 | 27 |
| **1.2-2.7 μm** | 0 | 0 | 0 | 0 | 3 | 5 | 0 | 0 | 0 | 0 | 0 | 0 | 3 | 5 |
| **>2.7 μm** | 550 | 35 | 233 | 28 | 196 | 19 | 347 | 331 | 255 | 12 | 501 | 57 | 2083 | 340 |
| 12 | **20-200 nm** | 89 | 12 | 0 | 0 | 37 | 4 | 0 | 0 | 46 | 41 | 58 | 51 | 230 | 67 |
| **200-1200 nm** | 43 | 1 | 20 | 2 | 15 | 1 | 0 | 0 | 27 | 1 | 41 | 2 | 145 | 4 |
| **1.2-2.7 μm** | 158 | 273 | 86 | 149 | 18 | 16 | 0 | 0 | 45 | 43 | 27 | 46 | 334 | 318 |
| **>2.7 μm** | 638 | 198 | 197 | 188 | 232 | 68 | 497 | 173 | 262 | 81 | 522 | 173 | 2349 | 382 |
| 13 | **20-200 nm** | 99 | 130 | 52 | 90 | 81 | 123 | 117 | 203 | 3 | 5 | 0 | 0 | 352 | 285 |
| **200-1200 nm** | 0 | 0 | 7 | 0 | 1 | 1 | 0 | 0 | 0 | 0 | 0 | 0 | 8 | 1 |
| **1.2-2.7 μm** | 127 | 110 | 54 | 47 | 54 | 32 | 98 | 85 | 90 | 90 | 125 | 118 | 548 | 211 |
| **>2.7 μm** | 848 | 38 | 378 | 25 | 387 | 7 | 905 | 132 | 183 | 17 | 336 | 295 | 3037 | 327 |
| 14 | **20-200 nm** | 16 | 9 | 10 | 0 | 5 | 2 | 0 | 0 | 6 | 10 | 0 | 0 | 36 | 13 |
| **200-1200 nm** | 17 | 16 | 7 | 1 | 10 | 4 | 0 | 0 | 21 | 11 | 16 | 16 | 71 | 26 |
| **1.2-2.7 μm** | 0 | 0 | 0 | 0 | 6 | 11 | 10 | 18 | 0 | 0 | 5 | 9 | 22 | 23 |
| **>2.7 μm** | 250 | 98 | 50 | 38 | 158 | 21 | 292 | 268 | 108 | 67 | 165 | 87 | 1023 | 309 |
| 15 | **20-200 nm** | 0 | 0 | 11 | 19 | 8 | 12 | 0 | 0 | 0 | 0 | 0 | 0 | 19 | 23 |
| **200-1200 nm** | 41 | 31 | 6 | 9 | 16 | 12 | 0 | 0 | 34 | 34 | 38 | 35 | 134 | 60 |
| **1.2-2.7 μm** | 7 | 6 | 0 | 0 | 2 | 4 | 0 | 0 | 0 | 0 | 0 | 0 | 9 | 7 |
| **>2.7 μm** | 112 | 103 | 0 | 0 | 71 | 62 | 0 | 0 | 16 | 28 | 27 | 47 | 226 | 132 |
| * The square root of all the calculated standard deviations. | | | | | | | | | | | | | | | |

Table S1. Depicting baseline data on the study persons including some use of plastics in everyday life. Concerning sex, 60% were female.

| Study person | Age | Sex (f/m) | BMI | City/  rural | Pacifier | Eat food stored in plastic container* | Drink from a plastic bottle |
| --- | --- | --- | --- | --- | --- | --- | --- |
| 1 | 31 | m | 22.6 | Rural village | 1 | 2 | 3 |
| 2 | 15 | f | 20.0 | City | 1 | 0 | - |
| 3 | 23 | m | 23.4 | City | 1 | 2 | - |
| 4 | 3,5 | m | 15.5 | City | 1 | 0 | 3 |
| 5 | 22 | f | 30.5 | City | 1 | 0 | 2 |
| 6 | 44 | f | 42.0 | City | 1 | 3 | 0 |
| 7 | 31 | m | 27.0 | City | 0 | 2 | 3 |
| 8 | 3 | f | 17.4 | Rural village | 0 | 2 | 3 |
| 9 | 5 | m | 15.3 | City | 0 | 3 | 2 |
| 10 | 5 | m | 14.9 | Rural village | 1 | 2 | 2 |
| 11 | 25 | f | 26.2 | City | 1 | 3 | 3 |
| 12 | 5 | f | 16.5 | City | 1 | 2 | 0 |
| 13 | 17 | f | 25.3 | Rural | 1 | 3 | 3 |
| 14 | 24 | f | 23.7 | City | 1 | 3 | 2 |
| 15 | 17 | f | 19.5 | Rural | 1 | 3 | 0 |
| Mean, (Min-max) when applicable | 18.0 (3-44 years) |  | 22.6 (14.9-42.0) |  |  |  |  |

*Do you/your child eat food which has been stored in plastic containers? (Never=0, some times per month=1, some times during a week =2, daily=3)


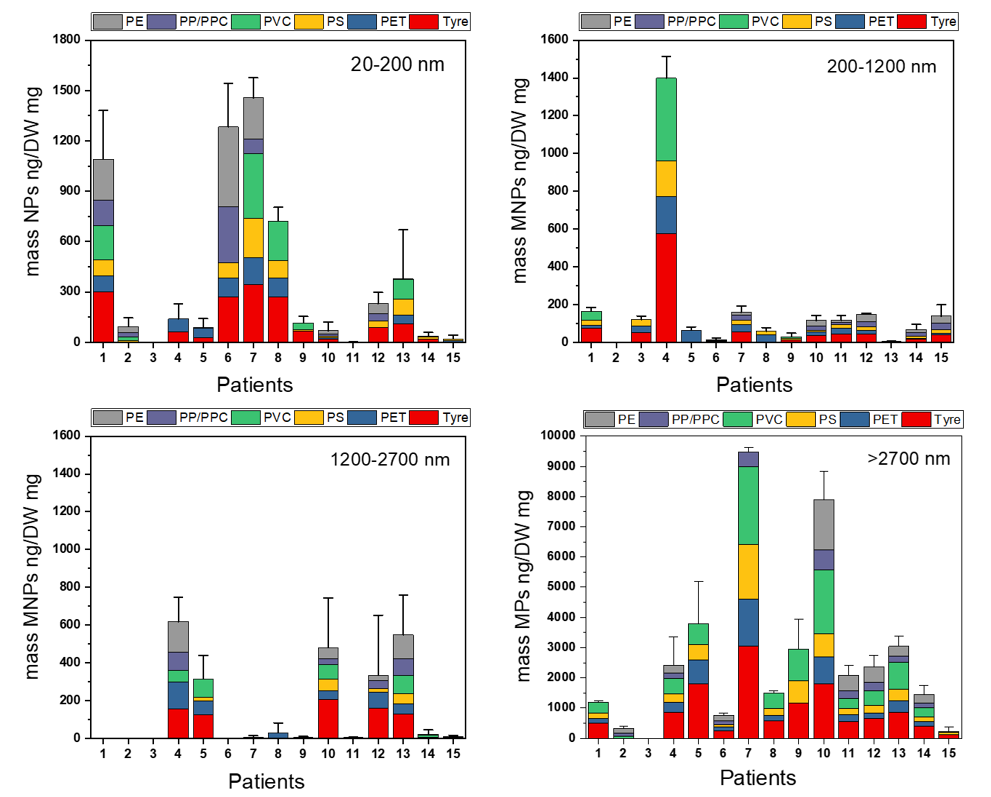


Figure S1. Nanoplastic and microplastic concentrations for each patient and plastic types. All values are corrected for measured blank contamination. The error bars represent the standard deviation of triplicates. The plastic types are Tyre, PET- Polyethylene terephthalate, PS - Polystyrene, PVC - Polyvinyl Chloride, PP – Polypropylene, PPC- Polypropylene Carbonate, and PE – Polyethylene.

# Figure S2. Size distribution of micro- and nanoplastics for each patient

**Patient:1**

**Patient:2**

**Patient:3**

**Patient:4**

**Patient:5**

**Patient:6**

**Patient:7**

**Patient:8**

**Patient:9**

**Patient:10**

**Patient:11**

**Patient:12**

**Patient:13**

**Patient:14**

**Patient:15**
