# Supplementary material for: Size distribution of nanoplastics and tyre wear particles in human tonsils
Source: Research Square preprint supplement (doi:10.21203/rs.3.rs-6154338/v1), 2025-03-31
Supplement: Supplementary file 2 [file 90ec78d3101021e473286271.xlsx]

## Sheet: 20-2700 nm
	20-200 nm										200-1200 nm
	An20	Tyre	PET	PS	PVC	PP/PPC	PE	SD	total		An200	Tyre	PET	PS	PVC	PP/PPC	PE	SD	total
	1	305	90	74	208	153	249	297	1079		1	76	17	20	48	0	0	21	161
	2	0	0	20	23	27	36	54	106		2	0	0	7	0	0	0	0	7
	3	0	54	49	0	0	0	0	103		3	52	32	33	0	0	0	20	117
	4	60	65	25	0	0	0	91	150		4	575	197	181	438	0	0	117	1391
	5	26	58	5	0	0	0	51	89		5	0	63	0	0	0	0	19	63
	6	269	97	78	0	332	475	260	1251		6	5	5	1	0	0	0	8	11
	7	321	163	214	385	88	244	120	1415		7	55	31	25	0	26	14	34	151
	8	272	87	81	237	0	0	83	677		8	0	40	15	0	0	0	20	55
	9	66	0	18	42	0	0	39	126		9	13	0	6	8	0	0	18	27
	10	20	8	9	0	14	19	46	70		10	35	14	8	0	25	27	28	109
	11	23	0	14	0	0	0	2	37		11	42	32	17	0	12	10	27	113
	12	89	0	37	0	46	58	67	230		12	43	20	15	0	27	41	4	146
	13	99	52	81	117	3	0	285	352		13	0	7	1	0	0	0	1	8
	14	16	10	5	0	6	0	13	37		14	17	7	10	0	21	16	26	71
	15	0	11	8	0	0	0	23	19		15	41	6	16	0	34	35	60	132
	Total	1566	695	718	1012	669	1081	1431			Total	954	471	355	494	145	143	403
	1200 -2700nm										>2700nm
	Silver	Tyre	PET	PS	PVC	PP/PPC	PE	SD	total		Glass	Tyre	PET	PS	PVC	PP/PPC	PE	SD	total
	membrane										membrane
	1	0	0	0	0	0	0	0	0		1	501	152	149	358	0	0	51	1160
	2	0	0	0	0	0	0	0	0		2	0	0	0	68	92	161	67	321
	3	0	0	0	0	0	0	0	0		3	0	44	29	0	0	0	0	73
	4	153	145	0	61	95	162	131	616		4	847	332	277	509	174	262	926	2401
	5	125	72	19	99	0	0	123	315		5	1806	775	524	692	0	0	1399	3797
	6	0	0	0	0	0	0	0	0		6	254	95	84	0	117	173	76	723
	7	0	0	7	0	0	0	7	7		7	3048	1544	1797	2571	505	0	138	9465
	8	0	30	0	0	0	0	51	30		8	565	162	189	527	0	0	63	1443
	9	0	0	3	0	0	0	6	3		9	1196	0	744	1076	0	0	1005	3016
	10	204	47	61	77	31	60	261	480		10	1794	902	759	2128	648	1665	189	7896
	11	0	0	3	0	0	0	5	3		11	550	233	196	347	255	501	340	2082
	12	158	86	18	0	45	27	318	334		12	638	197	232	497	262	522	382	2348
	13	127	54	54	98	90	125	211	548		13	848	378	387	905	183	336	327	3037
	14	0	0	6	10	0	5	23	21		14	250	50	158	292	108	165	309	1023
	15	7	0	2	0	0	0	7	9		15	112	0	71	0	16	27	132	226
	Total	774	434	173	345	261	379	1143			Total	12409	4864	5596	9970	2360	3812	5404

## Sheet: All_size
	20-200 nm										200-1200 nm
	An20	Tyre	PET	PS	PVC	PP/PPC	PE	SD	total		An200	Tyre	PET	PS	PVC	PP/PPC	PE	SD	total		Sum of all size in each patients
	1	305	90	74	208	153	249	297	1079		1	76	17	20	48	0	0	21	161			Tyre	PET	PS	PVC	PP/PPC	PE
	2	0	0	20	23	27	36	54	106		2	0	0	7	0	0	0	0	7		1	882	259	243	614	153	249
	3	0	54	49	0	0	0	0	103		3	52	32	33	0	0	0	20	117		2	0	0	27	91	119	197
	4	60	65	25	0	0	0	91	150		4	575	197	181	438	0	0	117	1391		3	52	130	111	0	0	0
	5	26	58	5	0	0	0	51	89		5	0	63	0	0	0	0	19	63		4	1635	739	483	1008	269	424
	6	269	97	78	0	332	475	260	1251		6	5	5	1	0	0	0	8	11		5	1957	968	548	791	0	0
	7	321	163	214	385	88	244	120	1415		7	55	31	25	0	26	14	34	151		6	528	197	163	0	449	648
	8	272	87	81	237	0	0	83	677		8	0	40	15	0	0	0	20	55		7	3424	1738	2043	2956	619	258
	9	66	0	18	42	0	0	39	126		9	13	0	6	8	0	0	18	27		8	837	319	285	764	0	0
	10	20	8	9	0	14	19	46	70		10	35	14	8	0	25	27	28	109		9	1275	0	771	1126	0	0
	11	23	0	14	0	0	0	2	37		11	42	32	17	0	12	10	27	113		10	2053	971	837	2205	718	1771
	12	89	0	37	0	46	58	67	230		12	43	20	15	0	27	41	4	146		11	615	265	230	347	267	511
	13	99	52	81	117	3	0	285	352		13	0	7	1	0	0	0	1	8		12	928	303	302	497	380	648
	14	16	10	5	0	6	0	13	37		14	17	7	10	0	21	16	26	71		13	1074	491	523	1120	276	461
	15	0	11	8	0	0	0	23	19		15	41	6	16	0	34	35	60	132		14	283	67	179	302	135	186
	Total	1566	695	718	1012	669	1081	1431			Total	954	471	355	494	145	143	403			15	160	17	97	0	50	62
																					Total	15703	6464	6842	11821	3435	5415
	1200 -2700nm										>2700nm											Comparsion MPs and NPs
	Silver	Tyre	PET	PS	PVC	PP/PPC	PE	SD	total		Glass	Tyre	PET	PS	PVC	PP/PPC	PE	SD	total				NPs	MPs
	membrane										membrane											Plastic type	20-200 nm	>1200 nm
	1	0	0	0	0	0	0	0	0		1	501	152	149	358	0	0	51	1160			Tyre	1566	13183
	2	0	0	0	0	0	0	0	0		2	0	0	0	68	92	161	67	321			PET	695	5037
	3	0	0	0	0	0	0	0	0		3	0	44	29	0	0	0	0	73			PS	718	5769
	4	153	145	0	61	95	162	131	616		4	847	332	277	509	174	262	926	2401			PVC	1012	10315
	5	125	72	19	99	0	0	123	315		5	1806	775	524	692	0	0	1399	3797			PP/PPC	669	2621
	6	0	0	0	0	0	0	0	0		6	254	95	84	0	117	173	76	723			PE	1081	4191
	7	0	0	7	0	0	0	7	7		7	3048	1544	1797	2571	505	0	138	9465
	8	0	30	0	0	0	0	51	30		8	565	162	189	527	0	0	63	1443
	9	0	0	3	0	0	0	6	3		9	1196	0	744	1076	0	0	1005	3016
	10	204	47	61	77	31	60	261	480		10	1794	902	759	2128	648	1665	189	7896
	11	0	0	3	0	0	0	5	3		11	550	233	196	347	255	501	340	2082
	12	158	86	18	0	45	27	318	334		12	638	197	232	497	262	522	382	2348
	13	127	54	54	98	90	125	211	548		13	848	378	387	905	183	336	327	3037
	14	0	0	6	10	0	5	23	21		14	250	50	158	292	108	165	309	1023
	15	7	0	2	0	0	0	7	9		15	112	0	71	0	16	27	132	226
	Total	774	434	173	345	261	379	1143			Total	12409	4864	5596	9970	2360	3812	5404

## Sheet: Sum_of_all_Samples
	20-200 nm									200-1200 nm
	An20	Tyre	PET	PS	PVC	PP/PPC	PE			An200	Tyre	PET	PS	PVC	PP/PPC	PE
	1	305	90	74	208	153	249			1	76	17	20	48	0	0			Mean fraction
	SD	113	40	39	79	134	219			SD	16	5	5	11	0	0				Tyre	PET	PS	PVC	PP/PPC	PE	Error (quad sum)
	2	0	0	20	23	27	36			2	0	0	7	0	0	0			20-200 nm	1566	695	718	1012	669	1081
	SD	0	0	10	22	29	39			SD	0	0	0	0	0	0			Mean fraction	104.4	46.3333	47.8667	67.4667	44.6	72.0667
	3	0	54	49	0	0	0			3	52	32	33	0	0	0			SD	766	286	281	453	342	492	1145.32	76.3544
	SD	0	0	0	0	0	0			SD	15	11	9	0	0	0
	4	60	65	25	0	0	0			4	575	197	181	438	0	0
	SD	84	34	0	0	0	0			SD	90	24	34	63	0	0			200-1200 nm	954	471	355	494	145	146
	5	26	58	5	0	0	0			5	0	63	0	0	0	0			Mean fraction	63.6	31.4	23.6667	32.9333	9.66667	9.73333
	SD	45	22	7	0	0	0			SD	0	19	0	0	0	0			SD	212	123	102	87	76	121	313.788	20.9192
	6	269	97	78	0	332	475			6	5	5	1	0	0	0
	SD	233	24	8	0	61	95			SD	8	1	1	0	0	0
	7	321	163	214	385	88	244			7	55	31	25	0	26	14			1200 -2700nm	774	434	173	345	261	379
	SD	64	24	42	58	39	56			SD	14	10	8	0	13	25			Mean fraction	51.6	28.9333	11.5333	23	17.4	25.2667
	8	272	87	81	237	0	0			8	0	40	15	0	0	0			SD	681	413	148	403	225	323	986.71	65.7807
	SD	57	19	16	54	0	0			SD	0	19	7	0	0	0
	9	66	0	18	42	0	0			9	13	0	6	8	0	0
	SD	1	0	11	37	0	0			SD	11	0	5	13	0	0			>2700nm	12409	4864	5596	9970	2360	3812
	10	20	8	9	0	14	19			10	35	14	8	0	25	27			Mean fraction	827.267	324.267	373.067	664.667	157.333	254.133
	SD	18	14	5	0	23	32			SD	7	7	7	0	7	25			SD	2434	1070	1251	3406	567	1297	4715.8	314.387
	11	23	0	14	0	0	0			11	42	32	17	0	12	10
	SD	0	0	2	0	0	0			SD	3	15	8	0	10	18
	12	89	0	37	0	46	58			12	43	20	15	0	27	41
	SD	12	0	4	0	41	51			SD	1	2	1	0	1	2
	13	99	52	81	117	3	0			13	0	7	1	0	0	0
	SD	130	90	123	203	5	0			SD	0	0	1	0	0	0
	14	16	10	5	0	6	0			14	17	7	10	0	21	16
	SD	9	0	2	0	10	0			SD	16	1	4	0	11	16
	15	0	11	8	0	0	0			15	41	6	16	0	34	38
	SD	0	19	12	0	0	0			SD	31	9	12	0	34	35
	Total	1566	695	718	1012	669	1081	Error (quad sum)		Total	954	471	355	494	145	146	Error (quad sum)
	SD	766	286	281	453	342	492	1145.32		SD	212	123	102	87	76	121	313.788
	average	104.4	46.3333	47.8667	67.4667	44.6	72.0667
	1200 -2700nm									>2700nm
	Silver	Tyre	PET	PS	PVC	PP/PPC	PE			Glass	Tyre	PET	PS	PVC	PP/PPC	PE
	membrane									membrane
	1	0	0	0	0	0	0			1	501	152	149	358	0	0
	SD	0	0	0	0	0	0			SD	33	14	8	35	0	0
	2	0	0	0	0	0	0			2	0	0	0	68	92	161
	SD	0	0	0	0	0	0			SD	0	0	0	59	6	30
	3	0	0	0	0	0	0			3	0	44	29	0	0	0
	SD	0	0	0	0	0	0			SD	0	0	0	0	0	0
	4	153	145	0	61	95	162			4	847	332	277	509	174	262
	SD	47	18	0	105	38	45			SD	466	284	257	443	302	455
	5	125	72	19	99	0	0			5	1806	775	524	692	0	0
	SD	77	67	32	61	0	0			SD	604	346	197	1198	0	0
	6	0	0	0	0	0	0			6	254	95	84	0	117	173
	SD	0	0	0	0	0	0			SD	53	26	32	0	20	29
	7	0	0	7	0	0	0			7	3048	1544	1797	2571	505	0
	SD	0	0	7	0	0	0			SD	19	34	129	20	25	0
	8	0	30	0	0	0	0			8	565	162	189	527	0	0
	SD	0	51	0	0	0	0			SD	35	5	16	49	0	0
	9	0	0	3	0	0	0			9	1196	0	744	1076	0	0
	SD	0	0	6	0	0	0			SD	680	0	425	606	0	0
	10	204	47	61	77	31	60			10	1794	902	759	2128	648	1665
	SD	168	81	35	134	54	105			SD	72	82	10	92	9	124
	11	0	0	3	0	0	0			11	550	233	196	347	255	501
	SD	0	0	5	0	0	0			SD	35	28	19	331	12	57
	12	158	86	18	0	45	27			12	638	197	232	497	262	522
	SD	273	149	16	0	43	46			SD	198	188	68	173	81	173
	13	127	54	54	98	90	125			13	848	378	387	905	183	336
	SD	110	47	32	85	90	118			SD	38	25	7	132	17	295
	14	0	0	6	10	0	5			14	250	50	158	292	108	165
	SD	0	0	11	18	0	9			SD	98	38	21	268	67	87
	15	7	0	2	0	0	0			15	112	0	71	0	16	27
	SD	6	0	4	0	0	0			SD	103	0	62	0	28	47
	Total	774	434	173	345	261	379	Error (quad sum)		Total	12409	4864	5596	9970	2360	3812	Error (quad sum)
	SD	681	413	148	403	225	323	986.71		SD	2434	1070	1251	3406	567	1297	4715.8

## Sheet: Sum_of_all_PB
	20-200 nm									200-1200 nm
	An20	Tyre	PET	PS	PVC	PP/PPC	PE			An200	Tyre	PET	PS	PVC	PP/PPC	PE
	1	0	75	257	0	0	0			1	0	5	64	0	0	0			Mean fraction
	SD	0	169	159	0	0	0			SD	0	10	84	0	0	0				Tyre	PET	PS	PVC	PP/PPC	PE	Error (quad sum)
	2	0	0	302	0	0	0			2	0	0	74	0	0	0			20-200 nm	1134	813	2637	0	0	103
	SD	0	0	175	0	0	0			SD	0	0	92	0	0	0			Mean fraction	75.6	54.2	175.8	0	0	6.86667
	3	0	182	200	0	0	0			3	0	0	38	0	0	0			SD	1821	1126	1899	0	0	230	2871.07	191.404
	SD	0	262	48	0	0	0			SD	0	0	86	0	0	0
	4	0	144	257	0	0	0			4	0	4	64	0	0	0
	SD	0	152	159	0	0	0			SD	0	9	84	0	0	0			200-1200 nm	0	284	468	0	0	0
	5	0	0	11	0	0	0			5	0	0	0	0	0	0			Mean fraction	0	18.9333	31.2	0	0	0
	SD	0	0	25	0	0	0			SD	0	0	0	0	0	0			SD	0	634	853	0	0	0	1062.81	70.854
	6	0	192	129	0	0	0			6	0	0	30	0	0	0
	SD	0	191	82	0	0	0			SD	0	0	66	0	0	0
	7	0	0	199	0	0	0			7	0	71	0	0	0	0			1200 -2700nm	27	0	53	54	21	0
	SD	0	0	151	0	0	0			SD	0	159	0	0	0	0			Mean fraction	1.8	0	3.53333	3.6	1.4	0
	8	0	220	230	0	0	0			8	0	0	37	0	0	0			SD	39	0	40	53	47	0	90.2164	6.01443
	SD	0	352	147	0	0	0			SD	0	0	83	0	0	0
	9	0	0	247	0	0	0			9	0	0	39	0	0	0
	SD	0	0	154	0	0	0			SD	0	0	87	0	0	0			>2700nm	1512	2100	2191	0	650	975
	10	138	0	138	0	0	0			10	0	61	0	0	0	0			Mean fraction	100.8	140	146.067	0	43.3333	65
	SD	310	0	148	0	0	0			SD	0	136	0	0	0	0			SD	334	1354	1151	0	123	569	1899.62	126.641
	11	229	0	154	0	0	0			11	0	0	33	0	0	0
	SD	350	0	163	0	0	0			SD	0	0	73	0	0	0
	12	251	0	200	0	0	0			12	0	0	33	0	0	0
	SD	380	0	153	0	0	0			SD	0	0	73	0	0	0
	13	257	0	154	0	0	0			13	0	71	32	0	0	0
	SD	389	0	165	0	0	0			SD	0	160	72	0	0	0
	14	259	0	159	0	0	103			14	0	72	0	0	0	0
	SD	392	0	170	0	0	230			SD	0	160	0	0	0	0
	15	0	0	0	0	0	0			15	0	0	24	0	0	0
	SD	0	0	0	0	0	0			SD	0	0	53	0	0	0
	Total	1134	813	2637	0	0	103	Error (quad sum)		Total	0	284	468	0	0	0	Error (quad sum)
	SD	1821	1126	1899	0	0	230	2871.07		SD	0	634	853	0	0	0	1062.81
	average	75.6	54.2	175.8	0	0	6.86667			average	0	18.9333	31.2	0	0	0
	1200 -2700nm									>2700nm
	Silver	Tyre	PET	PS	PVC	PP/PPC	PE			Glass	Tyre	PET	PS	PVC	PP/PPC	PE
	membrane									membrane
	1	14	0	26	54	21	0			1	0	51	191	0	0	0
	SD	21	0	20	53	47	0			SD	0	113	75	0	0	0
	2	0	0	0	0	0	0			2	0	0	379	0	0	0
	SD	0	0	0	0	0	0			SD	0	0	100	0	0	0
	3	0	0	0	0	0	0			3	0	462	298	0	0	0
	SD	0	0	0	0	0	0			SD	0	304	83	0	0	0
	4	13	0	27	0	0	0			4	0	49	190	0	0	0
	SD	18	0	20	0	0	0			SD	0	109	74	0	0	0
	5	0	0	0	0	0	0			5	0	0	0	0	0	0
	SD	0	0	0	0	0	0			SD	0	0	0	0	0	0
	6	0	0	0	0	0	0			6	0	129	159	0	0	0
	SD	0	0	0	0	0	0			SD	0	289	118	0	0	0
	7	0	0	0	0	0	0			7	27	0	184	0	0	0
	SD	0	0	0	0	0	0			SD	60	0	144	0	0	0
	8	0	0	0	0	0	0			8	0	356	257	0	0	0
	SD	0	0	0	0	0	0			SD	0	345	101	0	0	0
	9	0	0	0	0	0	0			9	0	0	300	0	0	0
	SD	0	0	0	0	0	0			SD	0	0	83	0	0	0
	10	0	0	0	0	0	0			10	0	0	34	0	0	0
	SD	0	0	0	0	0	0			SD	0	0	77	0	0	0
	11	0	0	0	0	0	0			11	0	0	0	0	0	0
	SD	0	0	0	0	0	0			SD	0	0	0	0	0	0
	12	0	0	0	0	0	0			12	23	0	137	0	0	0
	SD	0	0	0	0	0	0			SD	51	0	158	0	0	0
	13	0	0	0	0	0	0			13	0	0	62	0	0	0
	SD	0	0	0	0	0	0			SD	0	0	138	0	0	0
	14	0	0	0	0	0	0			14	1462	1053	0	0	650	975
	SD	0	0	0	0	0	0			SD	223	194	0	0	123	569
	15	0	0	0	0	0	0			15	0	0	0	0	0	0
	SD	0	0	0	0	0	0			SD	0	0	0	0	0	0
	Total	27	0	53	54	21	0	Error (quad sum)		Total	1512	2100	2191	0	650	975	Error (quad sum)
	SD	39	0	40	53	47	0	90.2164		SD	334	1354	1151	0	123	569	1899.62
	average	1.8	0	3.53333	3.6	1.4	0			average	100.8	140	146.067	0	43.3333	65

## Sheet: Graph
>2700nm	Plastic value
	Procedural Blank	Sample
Tyre	101	827			Mean fraction sample
PET	140	324				Tyre	PET	PS	PVC	PP/PPC	PE	Error (quad sum)
PS	146	373			20-200 nm	1566	695	718	1012	669	1081
PVC	0	665			Mean fraction	104.4	46.3333	47.8667	67.4667	44.6	72.0667
PP/PPC	43	157			SD	766	286	281	453	342	492	1145.32	76.3544
PE	65	254
SD	124	314
					200-1200 nm	954	471	355	494	145	146
					Mean fraction	63.6	31.4	23.6667	32.9333	9.66667	9.73333
					SD	212	123	102	87	76	121	313.788	20.9192
1200 -2700nm	Plastic value
	Procedural Blank	Sample
Tyre	101	827			1200 -2700nm	774	434	173	345	261	379
PET	140	324			Mean fraction	51.6	28.9333	11.5333	23	17.4	25.2667
PS	146	373			SD	681	413	148	403	225	323	986.71	65.7807
PVC	0	665
PP/PPC	43	157			Mean fraction PB
PE	65	254				Tyre	PET	PS	PVC	PP/PPC	PE	Error (quad sum)
SD	124	314			20-200 nm	1134	813	2637	0	0	103
					Mean fraction	75.6	54.2	175.8	0	0	6.86667
					SD	1821	1126	1899	0	0	230	2871.07	191.404
200-1200 nm	Plastic value
	Procedural Blank	Sample
Tyre	101	827			200-1200 nm	0	284	468	0	0	0
PET	140	324			Mean fraction	0	18.9333	31.2	0	0	0
PS	146	373			SD	0	634	853	0	0	0	1062.81	70.854
PVC	0	665
PP/PPC	43	157
PE	65	254			1200 -2700nm	27	0	53	54	21	0
SD	124	314			Mean fraction	1.8	0	3.53333	3.6	1.4	0
					SD	39	0	40	53	47	0	90.2164	6.01443
20-200 nm	Plastic value
	Procedural Blank	Sample			>2700nm	1512	2100	2191	0	650	975
Tyre	101	827			Mean fraction	100.8	140	146.067	0	43.3333	65
PET	140	324			SD	334	1354	1151	0	123	569	1899.62	126.641
PS	146	373
PVC	0	665
PP/PPC	43	157
PE	65	254
SD	124	314

## Sheet: SA
									GF*= Glass Fiber
									Ag*= Silver membrane
									An*= Anodisc
	Surface Area using Image Fiji software
	1						2						3						4
	Fragment nr.	GF* (mm)	Ag*(mm)	An*200	An*20		Fragment nr.	GF* (mm)	Ag*(mm)	An*200	An*20		Fragment nr.	GF* (mm)	Ag*(mm)	An*200	An*20		Fragment nr.	GF* (mm)	Ag*(mm)	An*200	An*20
	1	3	3	19.619	35.285		1	3	3	33.244	23.145		1	3	3	14.562	18.184		1	3	3	14.307	9.996
	2	3	3	21.507	37.567		2	3	3	15.811	10.15		2	3	3	14.319	7.589		2	3	3	19.797	20.138
	3	3	3	21.937	33.512		3	3	3	12.881	19.648		3	3	3	9.506	9.459		3	3	3	21.065	11.467
	5						6						7						8
	Fragment nr.	GF* (mm)	Ag*(mm)	An*200	An*20		Fragment nr.	GF* (mm)	Ag*(mm)	An*200	An*20		Fragment nr.	GF* (mm)	Ag*(mm)	An*200	An*20		Fragment nr.	GF* (mm)	Ag*(mm)	An*200	An*20
	1	3	3	30.921	9.312		1	3	3	34.289	18.721		1	3	3	39.503	14.636		1	3	3	21.722	41.771
	2	3	3	33.306	15.108		2	3	3	32.969	16.836		2	3	3	20.101	15.275		2	3	3	24.458	52.674
	3	3	3	30.238	23.149		3	3	3	35.992	10.566		3	3	3	25.057	9.489		3	3	3	23.99	23.118
	9						10						11						12
	Fragment nr.	GF* (mm)	Ag*(mm)	An*200	An*20		Fragment nr.	GF* (mm)	Ag*(mm)	An200	An20		Fragment nr.	GF* (mm)	Ag*(mm)	An*200	An*20		Fragment nr.	GF* (mm)	Ag*(mm)	An*200	An*20
	1	3	3	24.795	8.324		1	3	3	32.046	27.276		1	3	3	23.845	20.174		1	3	3	26.688	21.983
	2	3	3	21.906	9.095		2	3	3	33.147	10.126		2	3	3	27.502	17.701		2	3	3	24.76	20.468
	3	3	3	26.516	13.822		3	3	3	20.082	58.741		3	3	3	14.799	30.411		3	3	3	23.218	16.167
	13						14						15
	Fragment nr.	GF* (mm)	Ag*(mm)	An*200	An*20		Fragment nr.	GF* (mm)	Ag*(mm)	An*200	An*20		Fragment nr.	GF* (mm)	Ag*(mm)	An200	An20
	1	3	3	10.75	11.901		1	3	3	23.712	11.335		1	3	3	31.869	10.923
	2	3	3	24.805	13.407		2	3	3	39.482	19.786		2	3	3	13.319	11.691
	3	3	3	19.678	7.744		3	3	3	20.135	13.572		3	3	3	31.295	17.046
	Procedural blank
	Fragment nr.	GF* (mm)	Ag*(mm)	An*200	An*20
	1	3	3	11.961	11.563
	2	3	3	10.565	16.202
	3	3	3	15.954	30.874
	4	3	3	24.39	9.443
	5	3	3	27.149	25.86

## Sheet: 1
	Glass Fibre																											SD	Size Fraction	SD %	surface fragment	total surface of filter	ratio/percentage	corrected sample ng	Average	SD	SD%	Error (quad sum)	Total Plastics
	NEWmassLibrPE.csv																							Sample_P01_P01_GF_1-1.csv	0	ng		0	>2700 nm	#DIV/0!	7.06838	314.15	0.0225	0	0	0	#DIV/0!	51.087	1159.85
	NEWmassLibrPE.csv																							Sample_P01_P01_GF_2-2.csv	0	ng								0
	NEWmassLibrPE.csv																							Sample_P01_P01_GF_3-3.csv	0	ng								0
	NEWmassLibrPET.csv																							Sample_P01_P01_GF_1-1.csv	33.99	ng		3.24442		8.98067	7.06838	314.15	0.0225	143.129	152.439	14.1369	9.27382
	NEWmassLibrPET.csv																							Sample_P01_P01_GF_2-2.csv	34.53	ng								145.481
	NEWmassLibrPET.csv																							Sample_P01_P01_GF_3-3.csv	39.86	ng								168.706
	NEWmassLibrPPC.csv																							Sample_P01_P01_GF_1-1.csv	0	ng		0		#DIV/0!	7.06838	314.15	0.0225	0	0	0	#DIV/0!
	NEWmassLibrPPC.csv																							Sample_P01_P01_GF_2-2.csv	0	ng								0
	NEWmassLibrPPC.csv																							Sample_P01_P01_GF_3-3.csv	0	ng								0
	NEWmassLibrPS.csv																							Sample_P01_P01_GF_1-1.csv	38.66	ng		1.83873		4.78172	7.06838	314.15	0.0225	149.734	148.834	8.0119	5.38312
	NEWmassLibrPS.csv																							Sample_P01_P01_GF_2-2.csv	36.52	ng								140.41
	NEWmassLibrPS.csv																							Sample_P01_P01_GF_3-3.csv	40.18	ng								156.357
	NEWmassLibrPVC.csv																							Sample_P01_P01_GF_1-1.csv	74.89	ng		8.14378		9.92015	7.06838	314.15	0.0225	326.318	357.705	35.4849	9.92015
	NEWmassLibrPVC.csv																							Sample_P01_P01_GF_2-2.csv	80.46	ng								350.588
	NEWmassLibrPVC.csv																							Sample_P01_P01_GF_3-3.csv	90.93	ng								396.209
	NEWmassLibrTire.csv																							Sample_P01_P01_GF_1-1.csv	108.1	ng		7.56538		6.58145	7.06838	314.15	0.0225	471.024	500.871	32.9646	6.58145
	NEWmassLibrTire.csv																							Sample_P01_P01_GF_2-2.csv	113.68	ng								495.338
	NEWmassLibrTire.csv																							Sample_P01_P01_GF_3-3.csv	123.07	ng								536.253
	Procedural Blank
	NEWmassLibrPE.csv																							Blank_P01_PB1_GF_1-1.csv	0	ng		0		#DIV/0!	7.06838	314.15	0.0225	0	0	0
	NEWmassLibrPE.csv																							Blank_P01_PB1_GF_2-2.csv	0	ng								0
	NEWmassLibrPE.csv																							Blank_P01_PB1_GF_3-3.csv	0	ng								0
	NEWmassLibrPE.csv																							Blank_P01_PB1_GF_4-4.csv	0	ng								0
	NEWmassLibrPE.csv																							Blank_P01_PB1_GF_5-5.csv	0	ng								0
	NEWmassLibrPET.csv																							Blank_P01_PB1_GF_1-1.csv	5.71	ng		2.55359		223.607	7.06838	314.15	0.0225	253.778	50.7556	113.493
	NEWmassLibrPET.csv																							Blank_P01_PB1_GF_2-2.csv	0	ng								0
	NEWmassLibrPET.csv																							Blank_P01_PB1_GF_3-3.csv	0	ng								0
	NEWmassLibrPET.csv																							Blank_P01_PB1_GF_4-4.csv	0	ng								0
	NEWmassLibrPET.csv																							Blank_P01_PB1_GF_5-5.csv	0	ng								0
	NEWmassLibrPPC.csv																							Blank_P01_PB1_GF_1-1.csv	0	ng		0		#DIV/0!	7.06838	314.15	0.0225	0	0
	NEWmassLibrPPC.csv																							Blank_P01_PB1_GF_2-2.csv	0	ng								0
	NEWmassLibrPPC.csv																							Blank_P01_PB1_GF_3-3.csv	0	ng								0
	NEWmassLibrPPC.csv																							Blank_P01_PB1_GF_4-4.csv	0	ng								0
	NEWmassLibrPPC.csv																							Blank_P01_PB1_GF_5-5.csv	0	ng								0
	NEWmassLibrPS.csv																							Blank_P01_PB1_GF_1-1.csv	7.25	ng		1.67985		39.1025	7.06838	314.15	0.0225	322.222	190.933	74.6598
	NEWmassLibrPS.csv																							Blank_P01_PB1_GF_2-2.csv	3.03	ng								134.667
	NEWmassLibrPS.csv																							Blank_P01_PB1_GF_3-3.csv	3.75	ng								166.667
	NEWmassLibrPS.csv																							Blank_P01_PB1_GF_4-4.csv	3.66	ng								162.667
	NEWmassLibrPS.csv																							Blank_P01_PB1_GF_5-5.csv	3.79	ng								168.444
	NEWmassLibrPVC.csv																							Blank_P01_PB1_GF_1-1.csv	0	ng		0		#DIV/0!	7.06838	314.15	0.0225	0	0
	NEWmassLibrPVC.csv																							Blank_P01_PB1_GF_2-2.csv	0	ng								0
	NEWmassLibrPVC.csv																							Blank_P01_PB1_GF_3-3.csv	0	ng								0
	NEWmassLibrPVC.csv																							Blank_P01_PB1_GF_4-4.csv	0	ng								0
	NEWmassLibrPVC.csv																							Blank_P01_PB1_GF_5-5.csv	0	ng								0
	NEWmassLibrTire.csv																							Blank_P01_PB1_GF_1-1.csv	0	ng		0		#DIV/0!	7.06838	314.15	0.0225	0	0
	NEWmassLibrTire.csv																							Blank_P01_PB1_GF_2-2.csv	0	ng								0
	NEWmassLibrTire.csv																							Blank_P01_PB1_GF_3-3.csv	0	ng								0
	NEWmassLibrTire.csv																							Blank_P01_PB1_GF_4-4.csv	0	ng								0
	NEWmassLibrTire.csv																							Blank_P01_PB1_GF_5-5.csv	0	ng								0
	Silver membrane
	NEWmassLibrPE.csv																							Sample_P01_P01_Ag_1-4.csv	0	ng		0	1200-2700 nm	#DIV/0!	7.06838	314.15	0.0225	0	0	0	#DIV/0!	1.12127e-15	11.3551
	NEWmassLibrPE.csv																							Sample_P01_P01_Ag_2-5.csv	0	ng								0					0
	NEWmassLibrPE.csv																							Sample_P01_P01_Ag_3-6.csv	0	ng								0
	NEWmassLibrPET.csv																							Sample_P01_P01_Ag_1-4.csv	0	ng		0		#DIV/0!	7.06838	314.15	0.0225	0	0	0	#DIV/0!
	NEWmassLibrPET.csv																							Sample_P01_P01_Ag_2-5.csv	0	ng								0
	NEWmassLibrPET.csv																							Sample_P01_P01_Ag_3-6.csv	0	ng								0
	NEWmassLibrPPC.csv																							Sample_P01_P01_Ag_1-4.csv	0	ng		0		#DIV/0!	7.06838	314.15	0.0225	2.06536	2.06536	0	0
	NEWmassLibrPPC.csv																							Sample_P01_P01_Ag_2-5.csv	0	ng								2.06536
	NEWmassLibrPPC.csv																							Sample_P01_P01_Ag_3-6.csv	0	ng								2.06536
	NEWmassLibrPS.csv																							Sample_P01_P01_Ag_1-4.csv	0	ng		0		#DIV/0!	7.06838	314.15	0.0225	2.57952	2.57952	0	0
	NEWmassLibrPS.csv																							Sample_P01_P01_Ag_2-5.csv	0	ng								2.57952
	NEWmassLibrPS.csv																							Sample_P01_P01_Ag_3-6.csv	0	ng								2.57952
	NEWmassLibrPVC.csv																							Sample_P01_P01_Ag_1-4.csv	0	ng		0		#DIV/0!	7.06838	314.15	0.0225	5.33333	5.33333	1.08779e-15	2.03961e-14
	NEWmassLibrPVC.csv																							Sample_P01_P01_Ag_2-5.csv	0	ng								5.33333
	NEWmassLibrPVC.csv																							Sample_P01_P01_Ag_3-6.csv	0	ng								5.33333
	NEWmassLibrTire.csv																							Sample_P01_P01_Ag_1-4.csv	0	ng		0		#DIV/0!	7.06838	314.15	0.0225	1.37691	1.37691	2.71948e-16	1.97507e-14
	NEWmassLibrTire.csv																							Sample_P01_P01_Ag_2-5.csv	0	ng								1.37691
	NEWmassLibrTire.csv																							Sample_P01_P01_Ag_3-6.csv	0	ng								1.37691
	Procedural Blank
	NEWmassLibrPE.csv																							Blank_P01_PB1_Ag_1-6.csv	0	ng		0		#DIV/0!	7.06838	314.15	0.0225	0	0
	NEWmassLibrPE.csv																							Blank_P01_PB1_Ag_2-7.csv	0	ng								0
	NEWmassLibrPE.csv																							Blank_P01_PB1_Ag_3-8.csv	0	ng								0
	NEWmassLibrPE.csv																							Blank_P01_PB1_Ag_4-9.csv	0	ng								0
	NEWmassLibrPE.csv																							Blank_P01_PB1_Ag_5-10.csv	0	ng								0
	NEWmassLibrPET.csv																							Blank_P01_PB1_Ag_1-6.csv	0	ng		0		#DIV/0!	7.06838	314.15	0.0225	0	0
	NEWmassLibrPET.csv																							Blank_P01_PB1_Ag_2-7.csv	0	ng								0
	NEWmassLibrPET.csv																							Blank_P01_PB1_Ag_3-8.csv	0	ng								0
	NEWmassLibrPET.csv																							Blank_P01_PB1_Ag_4-9.csv	0	ng								0
	NEWmassLibrPET.csv																							Blank_P01_PB1_Ag_5-10.csv	0	ng								0
	NEWmassLibrPPC.csv																							Blank_P01_PB1_Ag_1-6.csv	0	ng		1.0599		223.607	7.06838	314.15	0.0225	0	21.0667	47.1065
	NEWmassLibrPPC.csv																							Blank_P01_PB1_Ag_2-7.csv	0	ng								0
	NEWmassLibrPPC.csv																							Blank_P01_PB1_Ag_3-8.csv	2.37	ng								105.333
	NEWmassLibrPPC.csv																							Blank_P01_PB1_Ag_4-9.csv	0	ng								0
	NEWmassLibrPPC.csv																							Blank_P01_PB1_Ag_5-10.csv	0	ng								0
	NEWmassLibrPS.csv																							Blank_P01_PB1_Ag_1-6.csv	0.9	ng		0.45746		77.2737	7.06838	314.15	0.0225	40	26.3111	20.3316
	NEWmassLibrPS.csv																							Blank_P01_PB1_Ag_2-7.csv	1.17	ng								52
	NEWmassLibrPS.csv																							Blank_P01_PB1_Ag_3-8.csv	0	ng								0
	NEWmassLibrPS.csv																							Blank_P01_PB1_Ag_4-9.csv	0.36	ng								16
	NEWmassLibrPS.csv																							Blank_P01_PB1_Ag_5-10.csv	0.53	ng								23.5556
	NEWmassLibrPVC.csv																							Blank_P01_PB1_Ag_1-6.csv	1.57	ng		1.18365		96.7035	7.06838	314.15	0.0225	69.7778	54.4	52.6067
	NEWmassLibrPVC.csv																							Blank_P01_PB1_Ag_2-7.csv	3.09	ng								137.333
	NEWmassLibrPVC.csv																							Blank_P01_PB1_Ag_3-8.csv	0	ng								0
	NEWmassLibrPVC.csv																							Blank_P01_PB1_Ag_4-9.csv	0.64	ng								28.4444
	NEWmassLibrPVC.csv																							Blank_P01_PB1_Ag_5-10.csv	0.82	ng								36.4444
	NEWmassLibrTire.csv																							Blank_P01_PB1_Ag_1-6.csv	0	ng		0.467418		147.917	7.06838	314.15	0.0225	0	14.0444	20.7742
	NEWmassLibrTire.csv																							Blank_P01_PB1_Ag_2-7.csv	0	ng								0
	NEWmassLibrTire.csv																							Blank_P01_PB1_Ag_3-8.csv	0	ng								0
	NEWmassLibrTire.csv																							Blank_P01_PB1_Ag_4-9.csv	0.54	ng								24
	NEWmassLibrTire.csv																							Blank_P01_PB1_Ag_5-10.csv	1.04	ng								46.2222
	An200																										Fragment size					total surface of filter	surface %	Conc. upscale ng	Average	SD	SD%	Error (quad sum)
	NEWmassLibrPE.csv																							Sample_P01_P01_An200_1-7.csv	0	ng	19.62	0	200-1200 nm			314.15	0.0624542	0	0	0	#DIV/0!	20.85	161.056
	NEWmassLibrPE.csv																							Sample_P01_P01_An200_2-8.csv	0	ng	21.51						0.0684705	0
	NEWmassLibrPE.csv																							Sample_P01_P01_An200_3-9.csv	0	ng	21.94						0.0698392	0
	NEWmassLibrPET.csv																							Sample_P01_P01_An200_1-7.csv	8.11	ng	19.62	3.74456				314.15	0.0624542	12.5321	17.2407	4.66911	27.0819
	NEWmassLibrPET.csv																							Sample_P01_P01_An200_2-8.csv	12.17	ng	21.51						0.0684705	17.3207
	NEWmassLibrPET.csv																							Sample_P01_P01_An200_3-9.csv	15.59	ng	21.94						0.0698392	21.8693
	NEWmassLibrPPC.csv																							Sample_P01_P01_An200_1-7.csv	0	ng	19.62	0				314.15	0.0624542	0	0	0	#DIV/0!
	NEWmassLibrPPC.csv																							Sample_P01_P01_An200_2-8.csv	0	ng	21.51						0.0684705	0
	NEWmassLibrPPC.csv																							Sample_P01_P01_An200_3-9.csv	0	ng	21.94						0.0698392	0
	NEWmassLibrPS.csv																							Sample_P01_P01_An200_1-7.csv	12.92	ng	19.62	4.37452				314.15	0.0624542	14.294	19.8777	5.12841	25.7998
	NEWmassLibrPS.csv																							Sample_P01_P01_An200_2-8.csv	18.73	ng	21.51						0.0684705	20.9617
	NEWmassLibrPS.csv																							Sample_P01_P01_An200_3-9.csv	21.49	ng	21.94						0.0698392	24.3775
	NEWmassLibrPVC.csv																							Sample_P01_P01_An200_1-7.csv	22.69	ng	19.62	8.97153				314.15	0.0624542	36.3306	48.2337	10.8559	22.5069
	NEWmassLibrPVC.csv																							Sample_P01_P01_An200_2-8.csv	34.77	ng	21.51						0.0684705	50.781
	NEWmassLibrPVC.csv																							Sample_P01_P01_An200_3-9.csv	40.22	ng	21.94						0.0698392	57.5894
	NEWmassLibrTire.csv																							Sample_P01_P01_An200_1-7.csv	36.71	ng	19.62	13.6641				314.15	0.0624542	58.779	75.7035	16.3942	21.6557
	NEWmassLibrTire.csv																							Sample_P01_P01_An200_2-8.csv	52.6	ng	21.51						0.0684705	76.8214
	NEWmassLibrTire.csv																							Sample_P01_P01_An200_3-9.csv	63.91	ng	21.94						0.0698392	91.5101
	Procedural Blank
	NEWmassLibrPE.csv																							Blank_P01_PB1_An200_1-11.csv	0	ng	11.96	0				314.15	0.038071	0	0
	NEWmassLibrPE.csv																							Blank_P01_PB1_An200_2-12.csv	0	ng	10.57						0.0336463	0
	NEWmassLibrPE.csv																							Blank_P01_PB1_An200_3-13.csv	0	ng	15.95						0.0507719	0
	NEWmassLibrPE.csv																							Blank_P01_PB1_An200_4-14.csv	0	ng	24.39						0.0776381	0
	NEWmassLibrPE.csv																							Blank_P01_PB1_An200_5-15.csv	0	ng	27.15						0.0864237	0
	NEWmassLibrPET.csv																							Blank_P01_PB1_An200_1-11.csv	0	ng	11.96	0.787096				314.15	0.038071	0	4.53386	10.138
	NEWmassLibrPET.csv																							Blank_P01_PB1_An200_2-12.csv	0	ng	10.57						0.0336463	0
	NEWmassLibrPET.csv																							Blank_P01_PB1_An200_3-13.csv	0	ng	15.95						0.0507719	0
	NEWmassLibrPET.csv																							Blank_P01_PB1_An200_4-14.csv	1.76	ng	24.39						0.0776381	22.6693
	NEWmassLibrPET.csv																							Blank_P01_PB1_An200_5-15.csv	0	ng	27.15						0.0864237	0
	NEWmassLibrPPC.csv																							Blank_P01_PB1_An200_1-11.csv	0	ng	11.96	0				314.15	0.038071	0	0
	NEWmassLibrPPC.csv																							Blank_P01_PB1_An200_2-12.csv	0	ng	10.57						0.0336463	0
	NEWmassLibrPPC.csv																							Blank_P01_PB1_An200_3-13.csv	0	ng	15.95						0.0507719	0
	NEWmassLibrPPC.csv																							Blank_P01_PB1_An200_4-14.csv	0	ng	24.39						0.0776381	0
	NEWmassLibrPPC.csv																							Blank_P01_PB1_An200_5-15.csv	0	ng	27.15						0.0864237	0
	NEWmassLibrPS.csv																							Blank_P01_PB1_An200_1-11.csv	1.44	ng	11.96	7.54835				314.15	0.038071	37.8241	63.9315	83.6735
	NEWmassLibrPS.csv																							Blank_P01_PB1_An200_2-12.csv	0	ng	10.57						0.0336463	0
	NEWmassLibrPS.csv																							Blank_P01_PB1_An200_3-13.csv	1.86	ng	15.95						0.0507719	36.6344
	NEWmassLibrPS.csv																							Blank_P01_PB1_An200_4-14.csv	2.66	ng	24.39						0.0776381	34.2615
	NEWmassLibrPS.csv																							Blank_P01_PB1_An200_5-15.csv	18.23	ng	27.15						0.0864237	210.938
	NEWmassLibrPVC.csv																							Blank_P01_PB1_An200_1-11.csv	0	ng	11.96	0				314.15	0.038071	0	0
	NEWmassLibrPVC.csv																							Blank_P01_PB1_An200_2-12.csv	0	ng	10.57						0.0336463	0
	NEWmassLibrPVC.csv																							Blank_P01_PB1_An200_3-13.csv	0	ng	15.95						0.0507719	0
	NEWmassLibrPVC.csv																							Blank_P01_PB1_An200_4-14.csv	0	ng	24.39						0.0776381	0
	NEWmassLibrPVC.csv																							Blank_P01_PB1_An200_5-15.csv	0	ng	27.15						0.0864237	0
	NEWmassLibrTire.csv																							Blank_P01_PB1_An200_1-11.csv	0	ng	11.96	0				314.15	0.038071	0	0
	NEWmassLibrTire.csv																							Blank_P01_PB1_An200_2-12.csv	0	ng	10.57						0.0336463	0
	NEWmassLibrTire.csv																							Blank_P01_PB1_An200_3-13.csv	0	ng	15.95						0.0507719	0
	NEWmassLibrTire.csv																							Blank_P01_PB1_An200_4-14.csv	0	ng	24.39						0.0776381	0
	NEWmassLibrTire.csv																							Blank_P01_PB1_An200_5-15.csv	0	ng	27.15						0.0864237	0
	An20																										Fragment size
	NEWmassLibrPE.csv																							Sample_P01_P01_An20_1-10.csv	376.39	ng	35.29	237.91	20-200 nm			314.15	0.112335	335.061	249.275	219.346	87.9938	297.318	1079.16
	NEWmassLibrPE.csv																							Sample_P01_P01_An20_2-11.csv	0	ng	37.57						0.119593	0
	NEWmassLibrPE.csv																							Sample_P01_P01_An20_3-12.csv	440.29	ng	33.51						0.106669	412.764
	NEWmassLibrPET.csv																							Sample_P01_P01_An20_1-10.csv	119.9	ng	35.29	39.3389				314.15	0.112335	99.1909	89.901	39.7395	44.2036
	NEWmassLibrPET.csv																							Sample_P01_P01_An20_2-11.csv	64.44	ng	37.57						0.119593	46.3394
	NEWmassLibrPET.csv																							Sample_P01_P01_An20_3-12.csv	140.5	ng	33.51						0.106669	124.173
	NEWmassLibrPPC.csv																							Sample_P01_P01_An20_1-10.csv	232.33	ng	35.29	145.85				314.15	0.112335	206.819	152.976	134.402	87.8585
	NEWmassLibrPPC.csv																							Sample_P01_P01_An20_2-11.csv	0	ng	37.57						0.119593	0
	NEWmassLibrPPC.csv																							Sample_P01_P01_An20_3-12.csv	268.92	ng	33.51						0.106669	252.107
	NEWmassLibrPS.csv																							Sample_P01_P01_An20_1-10.csv	130.07	ng	35.29	39.3386				314.15	0.112335	90.1052	73.9749	39.3055	53.1336
	NEWmassLibrPS.csv																							Sample_P01_P01_An20_2-11.csv	65.6	ng	37.57						0.119593	29.1704
	NEWmassLibrPS.csv																							Sample_P01_P01_An20_3-12.csv	136.89	ng	33.51						0.106669	102.649
	NEWmassLibrPVC.csv																							Sample_P01_P01_An20_1-10.csv	258.85	ng	35.29	77.632				314.15	0.112335	230.427	208.363	79.0402	37.934
	NEWmassLibrPVC.csv																							Sample_P01_P01_An20_2-11.csv	144.27	ng	37.57						0.119593	120.635
	NEWmassLibrPVC.csv																							Sample_P01_P01_An20_3-12.csv	292.3	ng	33.51						0.106669	274.026
	NEWmassLibrTire.csv																							Sample_P01_P01_An20_1-10.csv	375.89	ng	35.29	110.817				314.15	0.112335	334.616	304.667	113.357	37.2069
	NEWmassLibrTire.csv																							Sample_P01_P01_An20_2-11.csv	214.48	ng	37.57						0.119593	179.342
	NEWmassLibrTire.csv																							Sample_P01_P01_An20_3-12.csv	426.72	ng	33.51						0.106669	400.042
	Procedural Blank
	NEWmassLibrPE.csv																							Blank_P01_PB1_An20_1-16.csv	0	ng	11.96	0				314.15	0.038071	0	0
	NEWmassLibrPE.csv																							Blank_P01_PB1_An20_2-17.csv	0	ng	10.57						0.0336463	0
	NEWmassLibrPE.csv																							Blank_P01_PB1_An20_3-18.csv	0	ng	15.95						0.0507719	0
	NEWmassLibrPE.csv																							Blank_P01_PB1_An20_4-19.csv	0	ng	24.39						0.0776381	0
	NEWmassLibrPE.csv																							Blank_P01_PB1_An20_5-20.csv	0	ng	27.15						0.0864237	0
	NEWmassLibrPET.csv																							Blank_P01_PB1_An20_1-16.csv	0	ng	11.96	8.56414				314.15	0.038071	0	75.4354	168.679
	NEWmassLibrPET.csv																							Blank_P01_PB1_An20_2-17.csv	0	ng	10.57						0.0336463	0
	NEWmassLibrPET.csv																							Blank_P01_PB1_An20_3-18.csv	19.15	ng	15.95						0.0507719	377.177
	NEWmassLibrPET.csv																							Blank_P01_PB1_An20_4-19.csv	0	ng	24.39						0.0776381	0
	NEWmassLibrPET.csv																							Blank_P01_PB1_An20_5-20.csv	0	ng	27.15						0.0864237	0
	NEWmassLibrPPC.csv																							Blank_P01_PB1_An20_1-16.csv	0	ng	11.96	0				314.15	0.038071	0	0
	NEWmassLibrPPC.csv																							Blank_P01_PB1_An20_2-17.csv	0	ng	10.57						0.0336463	0
	NEWmassLibrPPC.csv																							Blank_P01_PB1_An20_3-18.csv	0	ng	15.95						0.0507719	0
	NEWmassLibrPPC.csv																							Blank_P01_PB1_An20_4-19.csv	0	ng	24.39						0.0776381	0
	NEWmassLibrPPC.csv																							Blank_P01_PB1_An20_5-20.csv	0	ng	27.15						0.0864237	0
	NEWmassLibrPS.csv																							Blank_P01_PB1_An20_1-16.csv	8.42	ng	11.96	5.36945				314.15	0.038071	221.166	256.825	158.579
	NEWmassLibrPS.csv																							Blank_P01_PB1_An20_2-17.csv	15.81	ng	10.57						0.0336463	469.888
	NEWmassLibrPS.csv																							Blank_P01_PB1_An20_3-18.csv	18.18	ng	15.95						0.0507719	358.072
	NEWmassLibrPS.csv																							Blank_P01_PB1_An20_4-19.csv	5.3	ng	24.39						0.0776381	68.2655
	NEWmassLibrPS.csv																							Blank_P01_PB1_An20_5-20.csv	14.41	ng	27.15						0.0864237	166.737
	NEWmassLibrPVC.csv																							Blank_P01_PB1_An20_1-16.csv	0	ng	11.96	0				314.15	0.038071	0	0
	NEWmassLibrPVC.csv																							Blank_P01_PB1_An20_2-17.csv	0	ng	10.57						0.0336463	0
	NEWmassLibrPVC.csv																							Blank_P01_PB1_An20_3-18.csv	0	ng	15.95						0.0507719	0
	NEWmassLibrPVC.csv																							Blank_P01_PB1_An20_4-19.csv	0	ng	24.39						0.0776381	0
	NEWmassLibrPVC.csv																							Blank_P01_PB1_An20_5-20.csv	0	ng	27.15						0.0864237	0
	NEWmassLibrTire.csv																							Blank_P01_PB1_An20_1-16.csv	0	ng	11.96	0				314.15	0.038071	0	0
	NEWmassLibrTire.csv																							Blank_P01_PB1_An20_2-17.csv	0	ng	10.57						0.0336463	0
	NEWmassLibrTire.csv																							Blank_P01_PB1_An20_3-18.csv	0	ng	15.95						0.0507719	0
	NEWmassLibrTire.csv																							Blank_P01_PB1_An20_4-19.csv	0	ng	24.39						0.0776381	0
	NEWmassLibrTire.csv																							Blank_P01_PB1_An20_5-20.csv	0	ng	27.15						0.0864237	0

## Sheet: 2
	Glass Fibre																											SD	Size Fraction	SD %	surface fragment	total surface of filter	ratio/percentage	corrected sample ng	Average	SD	SD%	Error (quad sum)	Total Plastics
	NEWmassLibrPE-LD.csv																							Sample2_P02_GF_1-1.csv	30.93	ng		7.03049	>2700 nm	18.8401	7.06838	314.15	0.0225	133.463	161.021	30.3365	18.8401	66.7226	320.964
	NEWmassLibrPE-LD.csv																							Sample2_P02_GF_2-2.csv	44.85	ng								193.528
	NEWmassLibrPE-LD.csv																							Sample2_P02_GF_3-3.csv	36.17	ng								156.073
	NEWmassLibrPPC.csv																							Sample2_P02_GF_1-1.csv	19.91	ng		1.46092		6.84594	7.06838	314.15	0.0225	85.9115	92.082	6.30388	6.84594
	NEWmassLibrPPC.csv																							Sample2_P02_GF_2-2.csv	21.28	ng								91.8231
	NEWmassLibrPPC.csv																							Sample2_P02_GF_3-3.csv	22.83	ng								98.5113
	NEWmassLibrPS.csv																							Sample2_P02_GF_1-1.csv	0	ng		0		#DIV/0!	7.06838	314.15	0.0225	0	0	0	#DIV/0!
	NEWmassLibrPS.csv																							Sample2_P02_GF_2-2.csv	0	ng								0
	NEWmassLibrPS.csv																							Sample2_P02_GF_3-3.csv	0	ng								0
	NEWmassLibrPVC.csv																							Sample2_P02_GF_1-1.csv	25.02	ng		13.6946		87.0786	7.06838	314.15	0.0225	107.961	67.8605	59.0919	87.0786
	NEWmassLibrPVC.csv																							Sample2_P02_GF_2-2.csv	0	ng								0
	NEWmassLibrPVC.csv																							Sample2_P02_GF_3-3.csv	22.16	ng								95.6203
	Procedural Blank
	NEWmassLibrPE-LD.csv																							Blank_P02_PB1_GF_1-1.csv	0	ng		0		#DIV/0!	7.06838	314.15	0.0225	0	0
	NEWmassLibrPE-LD.csv																							Blank_P02_PB1_GF_2-2.csv	0	ng								0
	NEWmassLibrPE-LD.csv																							Blank_P02_PB1_GF_3-3.csv	0	ng								0
	NEWmassLibrPE-LD.csv																							Blank_P02_PB1_GF_4-4.csv	0	ng								0
	NEWmassLibrPE-LD.csv																							Blank_P02_PB1_GF_5-5.csv	0	ng								0
	NEWmassLibrPPC.csv																							Blank_P02_PB1_GF_1-1.csv	0	ng		0		#DIV/0!	7.06838	314.15	0.0225	0	0
	NEWmassLibrPPC.csv																							Blank_P02_PB1_GF_2-2.csv	0	ng								0
	NEWmassLibrPPC.csv																							Blank_P02_PB1_GF_3-3.csv	0	ng								0
	NEWmassLibrPPC.csv																							Blank_P02_PB1_GF_4-4.csv	0	ng								0
	NEWmassLibrPPC.csv																							Blank_P02_PB1_GF_5-5.csv	0	ng								0
	NEWmassLibrPS.csv																							Blank_P02_PB1_GF_1-1.csv	12.43	ng		2.23972		26.257	7.06838	314.15	0.0225	552.444	379.111
	NEWmassLibrPS.csv																							Blank_P02_PB1_GF_2-2.csv	7.18	ng								319.111
	NEWmassLibrPS.csv																							Blank_P02_PB1_GF_3-3.csv	8.3	ng								368.889
	NEWmassLibrPS.csv																							Blank_P02_PB1_GF_4-4.csv	6.99	ng								310.667
	NEWmassLibrPS.csv																							Blank_P02_PB1_GF_5-5.csv	7.75	ng								344.444
	NEWmassLibrPVC.csv																							Blank_P02_PB1_GF_1-1.csv	0	ng		0		#DIV/0!	7.06838	314.15	0.0225	0	0
	NEWmassLibrPVC.csv																							Blank_P02_PB1_GF_2-2.csv	0	ng								0
	NEWmassLibrPVC.csv																							Blank_P02_PB1_GF_3-3.csv	0	ng								0
	NEWmassLibrPVC.csv																							Blank_P02_PB1_GF_4-4.csv	0	ng								0
	NEWmassLibrPVC.csv																							Blank_P02_PB1_GF_5-5.csv	0	ng								0
	Silver membrane
	NEWmassLibrPE-LD.csv																							Sample2_P02_Ag_1-4.csv	0	ng		0	1200-2700 nm	#DIV/0!	7.06838	314.15	0.0225	0	0	0	#DIV/0!	0	0
	NEWmassLibrPE-LD.csv																							Sample2_P02_Ag_2-5.csv	0	ng								0
	NEWmassLibrPE-LD.csv																							Sample2_P02_Ag_3-6.csv	0	ng								0
	NEWmassLibrPPC.csv																							Sample2_P02_Ag_1-4.csv	0	ng		0		#DIV/0!	7.06838	314.15	0.0225	0	0	0	#DIV/0!
	NEWmassLibrPPC.csv																							Sample2_P02_Ag_2-5.csv	0	ng								0
	NEWmassLibrPPC.csv																							Sample2_P02_Ag_3-6.csv	0	ng								0
	NEWmassLibrPS.csv																							Sample2_P02_Ag_1-4.csv	0	ng		0		#DIV/0!	7.06838	314.15	0.0225	0	0	0	#DIV/0!
	NEWmassLibrPS.csv																							Sample2_P02_Ag_2-5.csv	0	ng								0
	NEWmassLibrPS.csv																							Sample2_P02_Ag_3-6.csv	0	ng								0
	NEWmassLibrPVC.csv																							Sample2_P02_Ag_1-4.csv	0	ng		0		#DIV/0!	7.06838	314.15	0.0225	0	0	0	#DIV/0!
	NEWmassLibrPVC.csv																							Sample2_P02_Ag_2-5.csv	0	ng								0
	NEWmassLibrPVC.csv																							Sample2_P02_Ag_3-6.csv	0	ng								0
	Procedural Blank
	NEWmassLibrPE-LD.csv																							Blank_P02_PB1_Ag_1-6.csv	0	ng		0		#DIV/0!	7.06838	314.15	0.0225	0	0
	NEWmassLibrPE-LD.csv																							Blank_P02_PB1_Ag_2-7.csv	0	ng								0
	NEWmassLibrPE-LD.csv																							Blank_P02_PB1_Ag_3-8.csv	0	ng								0
	NEWmassLibrPE-LD.csv																							Blank_P02_PB1_Ag_4-9.csv	0	ng								0
	NEWmassLibrPE-LD.csv																							Blank_P02_PB1_Ag_5-10.csv	0	ng								0
	NEWmassLibrPPC.csv																							Blank_P02_PB1_Ag_1-6.csv	0	ng		0		#DIV/0!	7.06838	314.15	0.0225	0	0
	NEWmassLibrPPC.csv																							Blank_P02_PB1_Ag_2-7.csv	0	ng								0
	NEWmassLibrPPC.csv																							Blank_P02_PB1_Ag_3-8.csv	0	ng								0
	NEWmassLibrPPC.csv																							Blank_P02_PB1_Ag_4-9.csv	0	ng								0
	NEWmassLibrPPC.csv																							Blank_P02_PB1_Ag_5-10.csv	0	ng								0
	NEWmassLibrPS.csv																							Blank_P02_PB1_Ag_1-6.csv	0	ng		0		#DIV/0!	7.06838	314.15	0.0225	0	0
	NEWmassLibrPS.csv																							Blank_P02_PB1_Ag_2-7.csv	0	ng								0
	NEWmassLibrPS.csv																							Blank_P02_PB1_Ag_3-8.csv	0	ng								0
	NEWmassLibrPS.csv																							Blank_P02_PB1_Ag_4-9.csv	0	ng								0
	NEWmassLibrPS.csv																							Blank_P02_PB1_Ag_5-10.csv	0	ng								0
	NEWmassLibrPVC.csv																							Blank_P02_PB1_Ag_1-6.csv	0	ng		0		#DIV/0!	7.06838	314.15	0.0225	0	0
	NEWmassLibrPVC.csv																							Blank_P02_PB1_Ag_2-7.csv	0	ng								0
	NEWmassLibrPVC.csv																							Blank_P02_PB1_Ag_3-8.csv	0	ng								0
	NEWmassLibrPVC.csv																							Blank_P02_PB1_Ag_4-9.csv	0	ng								0
	NEWmassLibrPVC.csv																							Blank_P02_PB1_Ag_5-10.csv	0	ng								0
	An200																										Fragment size					total surface of filter	surface %	Conc. upscale ng	Average	SD	SD%	Error (quad sum)
	NEWmassLibrPE-LD.csv																							Sample2_P02_An200_1-7.csv	0	ng	33.24	0	200-1200 nm			314.15	0.105809	0	0	0	#DIV/0!	0	7.38866
	NEWmassLibrPE-LD.csv																							Sample2_P02_An200_2-8.csv	0	ng	15.81						0.0503263	0
	NEWmassLibrPPC.csv																							Sample2_P02_An200_1-7.csv	0	ng	33.24	0				314.15	0.105809	0	0	0	#DIV/0!
	NEWmassLibrPPC.csv																							Sample2_P02_An200_2-8.csv	0	ng	15.81						0.0503263	0
	NEWmassLibrPS.csv																							Sample2_P02_An200_1-7.csv	0	ng	33.24	0				314.15	0.105809	7.38866	7.38866	0	0
	NEWmassLibrPS.csv																							Sample2_P02_An200_2-8.csv	0	ng	15.81						0.0503263	7.38866
	NEWmassLibrPVC.csv																							Sample2_P02_An200_1-7.csv	0	ng	33.24	0				314.15	0.105809	0	0	0	#DIV/0!
	NEWmassLibrPVC.csv																							Sample2_P02_An200_2-8.csv	0	ng	15.81						0.0503263	0
	Procedural Blank
	NEWmassLibrPE-LD.csv																							Blank_P02_PB1_An200_1-11.csv	0	ng	11.96	0				314.15	0.038071	0	0
	NEWmassLibrPE-LD.csv																							Blank_P02_PB1_An200_2-12.csv	0	ng	10.57						0.0336463	0
	NEWmassLibrPE-LD.csv																							Blank_P02_PB1_An200_3-13.csv	0	ng	15.95						0.0507719	0
	NEWmassLibrPE-LD.csv																							Blank_P02_PB1_An200_4-14.csv	0	ng	24.39						0.0776381	0
	NEWmassLibrPE-LD.csv																							Blank_P02_PB1_An200_5-15.csv	0	ng	27.15						0.0864237	0
	NEWmassLibrPPC.csv																							Blank_P02_PB1_An200_1-11.csv	0	ng	11.96	0				314.15	0.038071	0	0
	NEWmassLibrPPC.csv																							Blank_P02_PB1_An200_2-12.csv	0	ng	10.57						0.0336463	0
	NEWmassLibrPPC.csv																							Blank_P02_PB1_An200_3-13.csv	0	ng	15.95						0.0507719	0
	NEWmassLibrPPC.csv																							Blank_P02_PB1_An200_4-14.csv	0	ng	24.39						0.0776381	0
	NEWmassLibrPPC.csv																							Blank_P02_PB1_An200_5-15.csv	0	ng	27.15						0.0864237	0
	NEWmassLibrPS.csv																							Blank_P02_PB1_An200_1-11.csv	0	ng	11.96	8.02946				314.15	0.038071	0	73.8866
	NEWmassLibrPS.csv																							Blank_P02_PB1_An200_2-12.csv	0	ng	10.57						0.0336463	0
	NEWmassLibrPS.csv																							Blank_P02_PB1_An200_3-13.csv	3.99	ng	15.95						0.0507719	78.5867
	NEWmassLibrPS.csv																							Blank_P02_PB1_An200_4-14.csv	5.09	ng	24.39						0.0776381	65.5606
	NEWmassLibrPS.csv																							Blank_P02_PB1_An200_5-15.csv	19.47	ng	27.15						0.0864237	225.285
	NEWmassLibrPVC.csv																							Blank_P02_PB1_An200_1-11.csv	0	ng	11.96	0				314.15	0.038071	0	0
	NEWmassLibrPVC.csv																							Blank_P02_PB1_An200_2-12.csv	0	ng	10.57						0.0336463	0
	NEWmassLibrPVC.csv																							Blank_P02_PB1_An200_3-13.csv	0	ng	15.95						0.0507719	0
	NEWmassLibrPVC.csv																							Blank_P02_PB1_An200_4-14.csv	0	ng	24.39						0.0776381	0
	NEWmassLibrPVC.csv																							Blank_P02_PB1_An200_5-15.csv	0	ng	27.15						0.0864237	0
	An20																										Fragment size
	NEWmassLibrPE-LD.csv																							Sample2_P02_An20_1-9.csv	0	ng	23.15	13.2232	20-200 nm			314.15	0.0736909	0	36.4362	38.7944	106.472	54.2688	106.327
	NEWmassLibrPE-LD.csv																							Sample2_P02_An20_2-10.csv	24.95	ng	10.15						0.0323094	77.2221					86.6238
	NEWmassLibrPE-LD.csv																							Sample2_P02_An20_3-11.csv	20.07	ng	19.65						0.0625497	32.0865
	NEWmassLibrPPC.csv																							Sample2_P02_An20_1-9.csv	0	ng	23.15	9.81489				314.15	0.0736909	0	27.0378	29.0156	107.315
	NEWmassLibrPPC.csv																							Sample2_P02_An20_2-10.csv	18.64	ng	10.15						0.0323094	57.6922
	NEWmassLibrPPC.csv																							Sample2_P02_An20_3-11.csv	14.65	ng	19.65						0.0625497	23.4214
	NEWmassLibrPS.csv																							Sample2_P02_An20_1-9.csv	0	ng	23.15	3.94396				314.15	0.0736909	30.2033	19.7029	10.088	51.2004
	NEWmassLibrPS.csv																							Sample2_P02_An20_2-10.csv	6.5	ng	10.15						0.0323094	10.0853
	NEWmassLibrPS.csv																							Sample2_P02_An20_3-11.csv	7.12	ng	19.65						0.0625497	18.8203
	NEWmassLibrPVC.csv																							Sample2_P02_An20_1-9.csv	0	ng	23.15	8.68387				314.15	0.0736909	0	23.1498	22.2806	96.2453
	NEWmassLibrPVC.csv																							Sample2_P02_An20_2-10.csv	14.36	ng	10.15						0.0323094	44.4453
	NEWmassLibrPVC.csv																							Sample2_P02_An20_3-11.csv	15.64	ng	19.65						0.0625497	25.0041
	Procedural Blank
	NEWmassLibrPE-LD.csv																							Blank_P02_PB1_An20_1-16.csv	0	ng	11.96	0				314.15	0.038071	0	0
	NEWmassLibrPE-LD.csv																							Blank_P02_PB1_An20_2-17.csv	0	ng	10.57						0.0336463	0
	NEWmassLibrPE-LD.csv																							Blank_P02_PB1_An20_3-18.csv	0	ng	15.95						0.0507719	0
	NEWmassLibrPE-LD.csv																							Blank_P02_PB1_An20_4-19.csv	0	ng	24.39						0.0776381	0
	NEWmassLibrPE-LD.csv																							Blank_P02_PB1_An20_5-20.csv	0	ng	27.15						0.0864237	0
	NEWmassLibrPPC.csv																							Blank_P02_PB1_An20_1-16.csv	0	ng	11.96	0				314.15	0.038071	0	0
	NEWmassLibrPPC.csv																							Blank_P02_PB1_An20_2-17.csv	0	ng	10.57						0.0336463	0
	NEWmassLibrPPC.csv																							Blank_P02_PB1_An20_3-18.csv	0	ng	15.95						0.0507719	0
	NEWmassLibrPPC.csv																							Blank_P02_PB1_An20_4-19.csv	0	ng	24.39						0.0776381	0
	NEWmassLibrPPC.csv																							Blank_P02_PB1_An20_5-20.csv	0	ng	27.15						0.0864237	0
	NEWmassLibrPS.csv																							Blank_P02_PB1_An20_1-16.csv	10.98	ng	11.96	5.67545				314.15	0.038071	288.409	302.033
	NEWmassLibrPS.csv																							Blank_P02_PB1_An20_2-17.csv	17.91	ng	10.57						0.0336463	532.301
	NEWmassLibrPS.csv																							Blank_P02_PB1_An20_3-18.csv	20.77	ng	15.95						0.0507719	409.084
	NEWmassLibrPS.csv																							Blank_P02_PB1_An20_4-19.csv	6.72	ng	24.39						0.0776381	86.5555
	NEWmassLibrPS.csv																							Blank_P02_PB1_An20_5-20.csv	16.75	ng	27.15						0.0864237	193.813
	NEWmassLibrPVC.csv																							Blank_P02_PB1_An20_1-16.csv	0	ng	11.96	0				314.15	0.038071	0	0
	NEWmassLibrPVC.csv																							Blank_P02_PB1_An20_2-17.csv	0	ng	10.57						0.0336463	0
	NEWmassLibrPVC.csv																							Blank_P02_PB1_An20_3-18.csv	0	ng	15.95						0.0507719	0
	NEWmassLibrPVC.csv																							Blank_P02_PB1_An20_4-19.csv	0	ng	24.39						0.0776381	0
	NEWmassLibrPVC.csv																							Blank_P02_PB1_An20_5-20.csv	0	ng	27.15						0.0864237	0

## Sheet: 3
	Glass Fibre																											SD	Size Fraction	SD %	surface fragment	total surface of filter	ratio/percentage	corrected sample ng	Average	SD	SD%	Error (quad sum)	Total Plastics
	NEWmassLibrPET.csv																							Sample_P03_P03_GF_1-1.csv	0	ng		0	>2700 nm	#REF!	7.06838	314.15	0.0225	44.453	44.453	8.70234e-15	1.95765e-14	8.70234e-15	73.0769
	NEWmassLibrPET.csv																							Sample_P03_P03_GF_2-2.csv	0	ng								44.453
	NEWmassLibrPET.csv																							Sample_P03_P03_GF_3-3.csv	0	ng								44.453
	NEWmassLibrPS.csv																							Sample_P03_P03_GF_1-1.csv	0	ng		0		#REF!	7.06838	314.15	0.0225	28.6239	28.6239	0	0
	NEWmassLibrPS.csv																							Sample_P03_P03_GF_2-2.csv	0	ng								28.6239
	NEWmassLibrPS.csv																							Sample_P03_P03_GF_3-3.csv	0	ng								28.6239
	NEWmassLibrTire.csv																							Sample_P03_P03_GF_1-1.csv	0	ng		0		#REF!	7.06838	314.15	0.0225	0	0	0	#DIV/0!
	NEWmassLibrTire.csv																							Sample_P03_P03_GF_2-2.csv	0	ng								0
	NEWmassLibrTire.csv																							Sample_P03_P03_GF_3-3.csv	0	ng								0
	Procedural Blank
	NEWmassLibrPET.csv																							Sample_P03_PB1_GF_1-13.csv	19	ng		6.84833		65.8367	7.06838	314.15	0.0225	844.444	462.311
	NEWmassLibrPET.csv																							Sample_P03_PB1_GF_2-14.csv	0	ng								0
	NEWmassLibrPET.csv																							Sample_P03_PB1_GF_3-15.csv	11.29	ng								501.778
	NEWmassLibrPET.csv																							Sample_P03_PB1_GF_4-16.csv	9.4	ng								417.778
	NEWmassLibrPET.csv																							Sample_P03_PB1_GF_5-17.csv	12.32	ng								547.556
	NEWmassLibrPS.csv																							Sample_P03_PB1_GF_1-13.csv	9.91	ng		1.85881		27.7517	7.06838	314.15	0.0225	440.444	297.689
	NEWmassLibrPS.csv																							Sample_P03_PB1_GF_2-14.csv	5.66	ng								251.556
	NEWmassLibrPS.csv																							Sample_P03_PB1_GF_3-15.csv	6.45	ng								286.667
	NEWmassLibrPS.csv																							Sample_P03_PB1_GF_4-16.csv	5.23	ng								232.444
	NEWmassLibrPS.csv																							Sample_P03_PB1_GF_5-17.csv	6.24	ng								277.333
	NEWmassLibrTire.csv																							Sample_P03_PB1_GF_1-13.csv	0	ng		0		#DIV/0!	7.06838	314.15	0.0225	0	0
	NEWmassLibrTire.csv																							Sample_P03_PB1_GF_2-14.csv	0	ng								0
	NEWmassLibrTire.csv																							Sample_P03_PB1_GF_3-15.csv	0	ng								0
	NEWmassLibrTire.csv																							Sample_P03_PB1_GF_4-16.csv	0	ng								0
	NEWmassLibrTire.csv																							Sample_P03_PB1_GF_5-17.csv	0	ng								0
	Silver membrane
	NEWmassLibrPET.csv																							Sample_P03_P03_Ag_1-4.csv	0	ng		0	1200-2700 nm	#REF!	7.06838	314.15	0.0225	0	0	0	#DIV/0!	0	0
	NEWmassLibrPET.csv																							Sample_P03_P03_Ag_2-5.csv	0	ng								0
	NEWmassLibrPET.csv																							Sample_P03_P03_Ag_3-6.csv	0	ng								0
	NEWmassLibrPS.csv																							Sample_P03_P03_Ag_1-4.csv	0	ng		0		#REF!	7.06838	314.15	0.0225	0	0	0	#DIV/0!
	NEWmassLibrPS.csv																							Sample_P03_P03_Ag_2-5.csv	0	ng								0
	NEWmassLibrPS.csv																							Sample_P03_P03_Ag_3-6.csv	0	ng								0
	NEWmassLibrTire.csv																							Sample_P03_P03_Ag_1-4.csv	0	ng		0		#REF!	7.06838	314.15	0.0225	0	0	0	#DIV/0!
	NEWmassLibrTire.csv																							Sample_P03_P03_Ag_2-5.csv	0	ng								0
	NEWmassLibrTire.csv																							Sample_P03_P03_Ag_3-6.csv	0	ng								0
	Procedural Blank
	NEWmassLibrPET.csv																							Sample_P03_PB1_Ag_1-18.csv	0	ng		0		#DIV/0!	7.06838	314.15	0.0225	0	0
	NEWmassLibrPET.csv																							Sample_P03_PB1_Ag_2-19.csv	0	ng								0
	NEWmassLibrPET.csv																							Sample_P03_PB1_Ag_3-20.csv	0	ng								0
	NEWmassLibrPET.csv																							Sample_P03_PB1_Ag_4-21.csv	0	ng								0
	NEWmassLibrPET.csv																							Sample_P03_PB1_Ag_5-22.csv	0	ng								0
	NEWmassLibrPS.csv																							Sample_P03_PB1_Ag_1-18.csv	0	ng		0		#DIV/0!	7.06838	314.15	0.0225	0	0
	NEWmassLibrPS.csv																							Sample_P03_PB1_Ag_2-19.csv	0	ng								0
	NEWmassLibrPS.csv																							Sample_P03_PB1_Ag_3-20.csv	0	ng								0
	NEWmassLibrPS.csv																							Sample_P03_PB1_Ag_4-21.csv	0	ng								0
	NEWmassLibrPS.csv																							Sample_P03_PB1_Ag_5-22.csv	0	ng								0
	NEWmassLibrTire.csv																							Sample_P03_PB1_Ag_1-18.csv	0	ng		0		#DIV/0!	7.06838	314.15	0.0225	0	0
	NEWmassLibrTire.csv																							Sample_P03_PB1_Ag_2-19.csv	0	ng								0
	NEWmassLibrTire.csv																							Sample_P03_PB1_Ag_3-20.csv	0	ng								0
	NEWmassLibrTire.csv																							Sample_P03_PB1_Ag_4-21.csv	0	ng								0
	NEWmassLibrTire.csv																							Sample_P03_PB1_Ag_5-22.csv	0	ng								0
	An200																										Fragment size					total surface of filter	surface %	Conc. upscale ng	Average	SD	SD%	Error (quad sum)
	NEWmassLibrPET.csv																							Sample_P03_P03_An200_1-7.csv	19.87	ng	14.56	7.05526	200-1200 nm			314.15	0.0463473	41.2231	32.3791	10.7654	33.248	20.305	117.311
	NEWmassLibrPET.csv																							Sample_P03_P03_An200_2-8.csv	16.84	ng	14.32						0.0455833	35.5224
	NEWmassLibrPET.csv																							Sample_P03_P03_An200_3-9.csv	6.42	ng	9.51						0.0302722	20.3919
	NEWmassLibrPS.csv																							Sample_P03_P03_An200_1-7.csv	20.28	ng	14.56	6.78095				314.15	0.0463473	38.3864	32.681	9.06232	27.7296
	NEWmassLibrPS.csv																							Sample_P03_P03_An200_2-8.csv	19.49	ng	14.32						0.0455833	37.4251
	NEWmassLibrPS.csv																							Sample_P03_P03_An200_3-9.csv	8.16	ng	9.51	10.3508					0.0302722	22.2315
	NEWmassLibrTire.csv																							Sample_P03_P03_An200_1-7.csv	31.59	ng	14.56					314.15	0.0463473	65.5378	52.2506	14.6381	28.0151
	NEWmassLibrTire.csv																							Sample_P03_P03_An200_2-8.csv	25.91	ng	14.32						0.0455833	54.6548
	NEWmassLibrTire.csv																							Sample_P03_P03_An200_3-9.csv	11.51	ng	9.51						0.0302722	36.5594
	Procedural Blank
	NEWmassLibrPET.csv																							Sample_P03_PB1_An200_1-23.csv	0	ng	11.961	0				314.15	0.0380742	0	0
	NEWmassLibrPET.csv																							Sample_P03_PB1_An200_2-24.csv	0	ng	10.565						0.0336304	0
	NEWmassLibrPET.csv																							Sample_P03_PB1_An200_3-25.csv	0	ng	15.954						0.0507847	0
	NEWmassLibrPET.csv																							Sample_P03_PB1_An200_4-26.csv	0	ng	24.39						0.0776381	0
	NEWmassLibrPET.csv																							Sample_P03_PB1_An200_5-27.csv	0	ng	27.149						0.0864205	0
	NEWmassLibrPS.csv																							Sample_P03_PB1_An200_1-23.csv	0	ng	11.961	7.41033				314.15	0.0380742	0	38.3474
	NEWmassLibrPS.csv																							Sample_P03_PB1_An200_2-24.csv	0	ng	10.565						0.0336304	0
	NEWmassLibrPS.csv																							Sample_P03_PB1_An200_3-25.csv	0	ng	15.954						0.0507847	0
	NEWmassLibrPS.csv																							Sample_P03_PB1_An200_4-26.csv	0	ng	24.39						0.0776381	0
	NEWmassLibrPS.csv																							Sample_P03_PB1_An200_5-27.csv	16.57	ng	27.149						0.0864205	191.737
	NEWmassLibrTire.csv																							Sample_P03_PB1_An200_1-23.csv	0	ng	11.961	0				314.15	0.0380742	0	0
	NEWmassLibrTire.csv																							Sample_P03_PB1_An200_2-24.csv	0	ng	10.565						0.0336304	0
	NEWmassLibrTire.csv																							Sample_P03_PB1_An200_3-25.csv	0	ng	15.954						0.0507847	0
	NEWmassLibrTire.csv																							Sample_P03_PB1_An200_4-26.csv	0	ng	24.39						0.0776381	0
	NEWmassLibrTire.csv																							Sample_P03_PB1_An200_5-27.csv	0	ng	27.149						0.0864205	0
	An20																										Fragment size
	NEWmassLibrPET.csv																							Sample_P03_P03_An20_1-10.csv	0	ng	18.18	0	20-200 nm			314.15	0.0578704	53.6239	53.6239	0	0	0	102.726
	NEWmassLibrPET.csv																							Sample_P03_P03_An20_2-11.csv	0	ng	7.59						0.0241604	53.6239
	NEWmassLibrPET.csv																							Sample_P03_P03_An20_3-12.csv	0	ng	9.46						0.030113	53.6239
	NEWmassLibrPS.csv																							Sample_P03_P03_An20_1-10.csv	0	ng	18.18	0				314.15	0.0578704	49.1026	49.1026	0	0
	NEWmassLibrPS.csv																							Sample_P03_P03_An20_2-11.csv	0	ng	7.59						0.0241604	49.1026
	NEWmassLibrPS.csv																							Sample_P03_P03_An20_3-12.csv	0	ng	9.46						0.030113	49.1026
	NEWmassLibrTire.csv																							Sample_P03_P03_An20_1-10.csv	0	ng	18.18	0				314.15	0.0578704	0	0	0	#DIV/0!
	NEWmassLibrTire.csv																							Sample_P03_P03_An20_2-11.csv	0	ng	7.59						0.0241604	0
	NEWmassLibrTire.csv																							Sample_P03_P03_An20_3-12.csv	0	ng	9.46						0.030113	0
	Procedural Blank
	NEWmassLibrPET.csv																							Sample_P03_PB1_An20_1-28.csv	0	ng	11.563	17.2431				314.15	0.0368073	0	557.689
	NEWmassLibrPET.csv																							Sample_P03_PB1_An20_2-29.csv	29.32	ng	16.202						0.0515741	1303.11
	NEWmassLibrPET.csv																							Sample_P03_PB1_An20_3-30.csv	33.42	ng	30.874						0.0982779	1485.33
	NEWmassLibrPET.csv																							Sample_P03_PB1_An20_4-31.csv	0	ng	9.443						0.0300589	0
	NEWmassLibrPET.csv																							Sample_P03_PB1_An20_5-32.csv	0	ng	25.86						0.0823174	0
	NEWmassLibrPS.csv																							Sample_P03_PB1_An20_1-28.csv	8.35	ng	11.563	4.65469				314.15	0.0368073	371.111	510.667
	NEWmassLibrPS.csv																							Sample_P03_PB1_An20_2-29.csv	14.01	ng	16.202						0.0515741	622.667
	NEWmassLibrPS.csv																							Sample_P03_PB1_An20_3-30.csv	16.66	ng	30.874						0.0982779	740.444
	NEWmassLibrPS.csv																							Sample_P03_PB1_An20_4-31.csv	5.13	ng	9.443						0.0300589	228
	NEWmassLibrPS.csv																							Sample_P03_PB1_An20_5-32.csv	13.3	ng	25.86						0.0823174	591.111
	NEWmassLibrTire.csv																							Sample_P03_PB1_An20_1-28.csv	0	ng	11.563	0				314.15	0.0368073	0	0
	NEWmassLibrTire.csv																							Sample_P03_PB1_An20_2-29.csv	0	ng	16.202						0.0515741	0
	NEWmassLibrTire.csv																							Sample_P03_PB1_An20_3-30.csv	0	ng	30.874						0.0982779	0
	NEWmassLibrTire.csv																							Sample_P03_PB1_An20_4-31.csv	0	ng	9.443						0.0300589	0
	NEWmassLibrTire.csv																							Sample_P03_PB1_An20_5-32.csv	0	ng	25.86						0.0823174	0

## Sheet: 4
	Glass Fibre																											SD	Size Fraction	SD %	surface fragment	total surface of filter	ratio/percentage	corrected sample ng	Average	SD	SD%	Error (quad sum)	Total Plastics
	NEWmassLibrPE-LD.csv																							Sample3_P04_GF_1-1.csv	0	ng		104.339	>2700 nm	173.205	7.06838	314.15	0.0225	0	262.484	454.635	173.205	926.239	2402.86
	NEWmassLibrPE-LD.csv																							Sample3_P04_GF_2-2.csv	180.72	ng								787.451
	NEWmassLibrPE-LD.csv																							Sample3_P04_GF_3-3.csv	0	ng								0
	NEWmassLibrPET.csv																							Sample3_P04_GF_1-1.csv	112.85	ng		66.4149		86.6469	7.06838	314.15	0.0225	486.946	332.395	283.878	85.4037
	NEWmassLibrPET.csv																							Sample3_P04_GF_2-2.csv	117.1	ng								505.464
	NEWmassLibrPET.csv																							Sample3_P04_GF_3-3.csv	0	ng								4.7756
	NEWmassLibrPPC.csv																							Sample3_P04_GF_1-1.csv	0	ng		69.3455		173.205	7.06838	314.15	0.0225	0	174.452	302.159	173.205
	NEWmassLibrPPC.csv																							Sample3_P04_GF_2-2.csv	120.11	ng								523.355
	NEWmassLibrPPC.csv																							Sample3_P04_GF_3-3.csv	0	ng								0
	NEWmassLibrPS.csv																							Sample3_P04_GF_1-1.csv	98.49	ng		58.8959		86.7434	7.06838	314.15	0.0225	410.571	277.267	256.627	92.556
	NEWmassLibrPS.csv																							Sample3_P04_GF_2-2.csv	105.2	ng								439.808
	NEWmassLibrPS.csv																							Sample3_P04_GF_3-3.csv	0	ng								-18.5795
	NEWmassLibrPVC.csv																							Sample3_P04_GF_1-1.csv	165.52	ng		101.664		87.004	7.06838	314.15	0.0225	721.22	509.15	442.981	87.004
	NEWmassLibrPVC.csv																							Sample3_P04_GF_2-2.csv	185.03	ng								806.231
	NEWmassLibrPVC.csv																							Sample3_P04_GF_3-3.csv	0	ng								0
	NEWmassLibrTire.csv																							Sample3_P04_GF_1-1.csv	239.32	ng		106.97		55.0219	7.06838	314.15	0.0225	1042.79	847.117	466.1	55.0219
	NEWmassLibrTire.csv																							Sample3_P04_GF_2-2.csv	271.61	ng								1183.49
	NEWmassLibrTire.csv																							Sample3_P04_GF_3-3.csv	72.31	ng								315.076
	Procedural Blank
	NEWmassLibrPE-LD.csv																							Blank_P04_PB1_GF_1-1.csv	0	ng		0		#DIV/0!	7.06838	314.15	0.0225	0	0
	NEWmassLibrPE-LD.csv																							Blank_P04_PB1_GF_2-2.csv	0	ng								0
	NEWmassLibrPE-LD.csv																							Blank_P04_PB1_GF_3-3.csv	0	ng								0
	NEWmassLibrPE-LD.csv																							Blank_P04_PB1_GF_4-4.csv	0	ng								0
	NEWmassLibrPE-LD.csv																							Blank_P04_PB1_GF_5-5.csv	0	ng								0
	NEWmassLibrPET.csv																							Blank_P04_PB1_GF_1-1.csv	5.48	ng		2.45073		223.607	7.06838	314.15	0.0225	243.556	48.7111
	NEWmassLibrPET.csv																							Blank_P04_PB1_GF_2-2.csv	0	ng								0
	NEWmassLibrPET.csv																							Blank_P04_PB1_GF_3-3.csv	0	ng								0
	NEWmassLibrPET.csv																							Blank_P04_PB1_GF_4-4.csv	0	ng								0
	NEWmassLibrPET.csv																							Blank_P04_PB1_GF_5-5.csv	0	ng								0
	NEWmassLibrPPC.csv																							Blank_P04_PB1_GF_1-1.csv	0	ng		0		#DIV/0!	7.06838	314.15	0.0225	0	0
	NEWmassLibrPPC.csv																							Blank_P04_PB1_GF_2-2.csv	0	ng								0
	NEWmassLibrPPC.csv																							Blank_P04_PB1_GF_3-3.csv	0	ng								0
	NEWmassLibrPPC.csv																							Blank_P04_PB1_GF_4-4.csv	0	ng								0
	NEWmassLibrPPC.csv																							Blank_P04_PB1_GF_5-5.csv	0	ng								0
	NEWmassLibrPS.csv																							Blank_P04_PB1_GF_1-1.csv	7.18	ng		1.67019		39.1695	7.06838	314.15	0.0225	319.111	189.511
	NEWmassLibrPS.csv																							Blank_P04_PB1_GF_2-2.csv	2.91	ng								129.333
	NEWmassLibrPS.csv																							Blank_P04_PB1_GF_3-3.csv	3.74	ng								166.222
	NEWmassLibrPS.csv																							Blank_P04_PB1_GF_4-4.csv	3.68	ng								163.556
	NEWmassLibrPS.csv																							Blank_P04_PB1_GF_5-5.csv	3.81	ng								169.333
	NEWmassLibrPVC.csv																							Blank_P04_PB1_GF_1-1.csv	0	ng		0		#DIV/0!	7.06838	314.15	0.0225	0	0
	NEWmassLibrPVC.csv																							Blank_P04_PB1_GF_2-2.csv	0	ng								0
	NEWmassLibrPVC.csv																							Blank_P04_PB1_GF_3-3.csv	0	ng								0
	NEWmassLibrPVC.csv																							Blank_P04_PB1_GF_4-4.csv	0	ng								0
	NEWmassLibrPVC.csv																							Blank_P04_PB1_GF_5-5.csv	0	ng								0
	NEWmassLibrTire.csv																							Blank_P04_PB1_GF_1-1.csv	0	ng		0		#DIV/0!	7.06838	314.15	0.0225	0	0
	NEWmassLibrTire.csv																							Blank_P04_PB1_GF_2-2.csv	0	ng								0
	NEWmassLibrTire.csv																							Blank_P04_PB1_GF_3-3.csv	0	ng								0
	NEWmassLibrTire.csv																							Blank_P04_PB1_GF_4-4.csv	0	ng								0
	NEWmassLibrTire.csv																							Blank_P04_PB1_GF_5-5.csv	0	ng								0
	Silver membrane
	NEWmassLibrPE-LD.csv																							Sample3_P04_Ag_1-4.csv	33.11	ng		10.415	1200-2700 nm	28.0602	7.06838	314.15	0.0225	144.27	161.728	45.3813	28.0602	130.938	617.906
	NEWmassLibrPE-LD.csv																							Sample3_P04_Ag_2-5.csv	29.3	ng								127.669
	NEWmassLibrPE-LD.csv																							Sample3_P04_Ag_3-6.csv	48.94	ng								213.246
	NEWmassLibrPET.csv																							Sample3_P04_Ag_1-4.csv	32.29	ng		4.21747		12.6739	7.06838	314.15	0.0225	140.697	144.996	18.3768	12.6739
	NEWmassLibrPET.csv																							Sample3_P04_Ag_2-5.csv	29.64	ng								129.15
	NEWmassLibrPET.csv																							Sample3_P04_Ag_3-6.csv	37.9	ng								165.142
	NEWmassLibrPPC.csv																							Sample3_P04_Ag_1-4.csv	17.98	ng		8.76942		40.2452	7.06838	314.15	0.0225	78.3442	94.9455	38.211	40.2452
	NEWmassLibrPPC.csv																							Sample3_P04_Ag_2-5.csv	15.57	ng								67.8431
	NEWmassLibrPPC.csv																							Sample3_P04_Ag_3-6.csv	31.82	ng								138.649
	NEWmassLibrPS.csv																							Sample3_P04_Ag_1-4.csv	0	ng		0		#DIV/0!	7.06838	314.15	0.0225	2.64924	2.64924	0	0
	NEWmassLibrPS.csv																							Sample3_P04_Ag_2-5.csv	0	ng								2.64924
	NEWmassLibrPS.csv																							Sample3_P04_Ag_3-6.csv	0	ng								2.64924
	NEWmassLibrPVC.csv																							Sample3_P04_Ag_1-4.csv	41.81	ng		24.139		173.205	7.06838	314.15	0.0225	182.179	60.7262	105.181	173.205
	NEWmassLibrPVC.csv																							Sample3_P04_Ag_2-5.csv	0	ng								0
	NEWmassLibrPVC.csv																							Sample3_P04_Ag_3-6.csv	0	ng								0
	NEWmassLibrTire.csv																							Sample3_P04_Ag_1-4.csv	31.84	ng		10.824		30.6079	7.06838	314.15	0.0225	137.508	152.86	47.1633	30.854
	NEWmassLibrTire.csv																							Sample3_P04_Ag_2-5.csv	26.74	ng								115.285
	NEWmassLibrTire.csv																							Sample3_P04_Ag_3-6.csv	47.51	ng								205.786
	Procedural Blank
	NEWmassLibrPE-LD.csv																							Blank_P04_PB1_Ag_1-6.csv	0	ng		0		#DIV/0!	7.06838	314.15	0.0225	0	0
	NEWmassLibrPE-LD.csv																							Blank_P04_PB1_Ag_2-7.csv	0	ng								0
	NEWmassLibrPE-LD.csv																							Blank_P04_PB1_Ag_3-8.csv	0	ng								0
	NEWmassLibrPE-LD.csv																							Blank_P04_PB1_Ag_4-9.csv	0	ng								0
	NEWmassLibrPE-LD.csv																							Blank_P04_PB1_Ag_5-10.csv	0	ng								0
	NEWmassLibrPET.csv																							Blank_P04_PB1_Ag_1-6.csv	0	ng		0		#DIV/0!	7.06838	314.15	0.0225	0	0
	NEWmassLibrPET.csv																							Blank_P04_PB1_Ag_2-7.csv	0	ng								0
	NEWmassLibrPET.csv																							Blank_P04_PB1_Ag_3-8.csv	0	ng								0
	NEWmassLibrPET.csv																							Blank_P04_PB1_Ag_4-9.csv	0	ng								0
	NEWmassLibrPET.csv																							Blank_P04_PB1_Ag_5-10.csv	0	ng								0
	NEWmassLibrPPC.csv																							Blank_P04_PB1_Ag_1-6.csv	0	ng		0		#DIV/0!	7.06838	314.15	0.0225	0	0
	NEWmassLibrPPC.csv																							Blank_P04_PB1_Ag_2-7.csv	0	ng								0
	NEWmassLibrPPC.csv																							Blank_P04_PB1_Ag_3-8.csv	0	ng								0
	NEWmassLibrPPC.csv																							Blank_P04_PB1_Ag_4-9.csv	0	ng								0
	NEWmassLibrPPC.csv																							Blank_P04_PB1_Ag_5-10.csv	0	ng								0
	NEWmassLibrPS.csv																							Blank_P04_PB1_Ag_1-6.csv	0.91	ng		0.454335		74.7261	7.06838	314.15	0.0225	40.4444	27.0222
	NEWmassLibrPS.csv																							Blank_P04_PB1_Ag_2-7.csv	1.17	ng								52
	NEWmassLibrPS.csv																							Blank_P04_PB1_Ag_3-8.csv	0	ng								0
	NEWmassLibrPS.csv																							Blank_P04_PB1_Ag_4-9.csv	0.39	ng								17.3333
	NEWmassLibrPS.csv																							Blank_P04_PB1_Ag_5-10.csv	0.57	ng								25.3333
	NEWmassLibrPVC.csv																							Blank_P04_PB1_Ag_1-6.csv	0	ng		0		#DIV/0!	7.06838	314.15	0.0225	0	0
	NEWmassLibrPVC.csv																							Blank_P04_PB1_Ag_2-7.csv	0	ng								0
	NEWmassLibrPVC.csv																							Blank_P04_PB1_Ag_3-8.csv	0	ng								0
	NEWmassLibrPVC.csv																							Blank_P04_PB1_Ag_4-9.csv	0	ng								0
	NEWmassLibrPVC.csv																							Blank_P04_PB1_Ag_5-10.csv	0	ng								0
	NEWmassLibrTire.csv																							Blank_P04_PB1_Ag_1-6.csv	0	ng		0.414994		147.161	7.06838	314.15	0.0225	0	12.5333
	NEWmassLibrTire.csv																							Blank_P04_PB1_Ag_2-7.csv	0	ng								0
	NEWmassLibrTire.csv																							Blank_P04_PB1_Ag_3-8.csv	0	ng								0
	NEWmassLibrTire.csv																							Blank_P04_PB1_Ag_4-9.csv	0.49	ng								21.7778
	NEWmassLibrTire.csv																							Blank_P04_PB1_Ag_5-10.csv	0.92	ng								40.8889
	An200																										Fragment size					total surface of filter	surface %	Conc. upscale ng	Average	SD	SD%	Error (quad sum)
	NEWmassLibrPE-LD.csv																							Sample3_P04_An200_1-7.csv	0	ng	14.31	0	200-1200 nm			314.15	0.0455515	0	0	0	#DIV/0!	116.908	1390.93
	NEWmassLibrPE-LD.csv																							Sample3_P04_An200_2-8.csv	0	ng	19.8						0.0630272	0
	NEWmassLibrPE-LD.csv																							Sample3_P04_An200_3-9.csv	0	ng	21.07						0.0670699	0
	NEWmassLibrPET.csv																							Sample3_P04_An200_1-7.csv	90.54	ng	14.31	26.3438				314.15	0.0455515	194.458	197.262	23.6286	11.9783
	NEWmassLibrPET.csv																							Sample3_P04_An200_2-8.csv	143.09	ng	19.8						0.0630272	222.168
	NEWmassLibrPET.csv																							Sample3_P04_An200_3-9.csv	120.11	ng	21.07						0.0670699	175.161
	NEWmassLibrPPC.csv																							Sample3_P04_An200_1-7.csv	0	ng	14.31	0				314.15	0.0455515	0	0	0	#DIV/0!
	NEWmassLibrPPC.csv																							Sample3_P04_An200_2-8.csv	0	ng	19.8						0.0630272	0
	NEWmassLibrPPC.csv																							Sample3_P04_An200_3-9.csv	0	ng	21.07						0.0670699	0
	NEWmassLibrPS.csv																							Sample3_P04_An200_1-7.csv	81.38	ng	14.31	31.7609				314.15	0.0455515	168.836	180.906	33.6749	18.6146
	NEWmassLibrPS.csv																							Sample3_P04_An200_2-8.csv	144.82	ng	19.8						0.0630272	218.952
	NEWmassLibrPS.csv																							Sample3_P04_An200_3-9.csv	110.31	ng	21.07						0.0670699	154.929
	NEWmassLibrPVC.csv																							Sample3_P04_An200_1-7.csv	196.27	ng	14.31	64.7779				314.15	0.0455515	422.427	437.786	62.7593	14.3356
	NEWmassLibrPVC.csv																							Sample3_P04_An200_2-8.csv	325.81	ng	19.8						0.0630272	506.799
	NEWmassLibrPVC.csv																							Sample3_P04_An200_3-9.csv	262.79	ng	21.07						0.0670699	384.133
	NEWmassLibrTire.csv																							Sample3_P04_An200_1-7.csv	254.4	ng	14.31	89.8157				314.15	0.0455515	547.538	574.977	89.6467	15.5914
	NEWmassLibrTire.csv																							Sample3_P04_An200_2-8.csv	434.03	ng	19.8						0.0630272	675.136
	NEWmassLibrTire.csv																							Sample3_P04_An200_3-9.csv	343.6	ng	21.07						0.0670699	502.256
	Procedural Blank
	NEWmassLibrPE-LD.csv																							Blank_P04_PB1_An200_1-11.csv	0	ng	11.96	0				314.15	0.038071	0	0
	NEWmassLibrPE-LD.csv																							Blank_P04_PB1_An200_2-12.csv	0	ng	10.57						0.0336463	0
	NEWmassLibrPE-LD.csv																							Blank_P04_PB1_An200_3-13.csv	0	ng	15.95						0.0507719	0
	NEWmassLibrPE-LD.csv																							Blank_P04_PB1_An200_4-14.csv	0	ng	24.39						0.0776381	0
	NEWmassLibrPE-LD.csv																							Blank_P04_PB1_An200_5-15.csv	0	ng	27.15						0.0864237	0
	NEWmassLibrPET.csv																							Blank_P04_PB1_An200_1-11.csv	0	ng	11.96	0.724486				314.15	0.038071	0	4.17321
	NEWmassLibrPET.csv																							Blank_P04_PB1_An200_2-12.csv	0	ng	10.57						0.0336463	0
	NEWmassLibrPET.csv																							Blank_P04_PB1_An200_3-13.csv	0	ng	15.95						0.0507719	0
	NEWmassLibrPET.csv																							Blank_P04_PB1_An200_4-14.csv	1.62	ng	24.39						0.0776381	20.8661
	NEWmassLibrPET.csv																							Blank_P04_PB1_An200_5-15.csv	0	ng	27.15						0.0864237	0
	NEWmassLibrPPC.csv																							Blank_P04_PB1_An200_1-11.csv	0	ng	11.96	0				314.15	0.038071	0	0
	NEWmassLibrPPC.csv																							Blank_P04_PB1_An200_2-12.csv	0	ng	10.57						0.0336463	0
	NEWmassLibrPPC.csv																							Blank_P04_PB1_An200_3-13.csv	0	ng	15.95						0.0507719	0
	NEWmassLibrPPC.csv																							Blank_P04_PB1_An200_4-14.csv	0	ng	24.39						0.0776381	0
	NEWmassLibrPPC.csv																							Blank_P04_PB1_An200_5-15.csv	0	ng	27.15						0.0864237	0
	NEWmassLibrPS.csv																							Blank_P04_PB1_An200_1-11.csv	1.44	ng	11.96	7.58589				314.15	0.038071	37.8241	64.4235
	NEWmassLibrPS.csv																							Blank_P04_PB1_An200_2-12.csv	0	ng	10.57						0.0336463	0
	NEWmassLibrPS.csv																							Blank_P04_PB1_An200_3-13.csv	1.9	ng	15.95						0.0507719	37.4223
	NEWmassLibrPS.csv																							Blank_P04_PB1_An200_4-14.csv	2.7	ng	24.39						0.0776381	34.7768
	NEWmassLibrPS.csv																							Blank_P04_PB1_An200_5-15.csv	18.33	ng	27.15						0.0864237	212.095
	NEWmassLibrPVC.csv																							Blank_P04_PB1_An200_1-11.csv	0	ng	11.96	0				314.15	0.038071	0	0
	NEWmassLibrPVC.csv																							Blank_P04_PB1_An200_2-12.csv	0	ng	10.57						0.0336463	0
	NEWmassLibrPVC.csv																							Blank_P04_PB1_An200_3-13.csv	0	ng	15.95						0.0507719	0
	NEWmassLibrPVC.csv																							Blank_P04_PB1_An200_4-14.csv	0	ng	24.39						0.0776381	0
	NEWmassLibrPVC.csv																							Blank_P04_PB1_An200_5-15.csv	0	ng	27.15						0.0864237	0
	NEWmassLibrTire.csv																							Blank_P04_PB1_An200_1-11.csv	0	ng	11.96	0				314.15	0.038071	0	0
	NEWmassLibrTire.csv																							Blank_P04_PB1_An200_2-12.csv	0	ng	10.57						0.0336463	0
	NEWmassLibrTire.csv																							Blank_P04_PB1_An200_3-13.csv	0	ng	15.95						0.0507719	0
	NEWmassLibrTire.csv																							Blank_P04_PB1_An200_4-14.csv	0	ng	24.39						0.0776381	0
	NEWmassLibrTire.csv																							Blank_P04_PB1_An200_5-15.csv	0	ng	27.15						0.0864237	0
	An20																										Fragment size
	NEWmassLibrPE-LD.csv																							Sample3_P04_An20_1-10.csv	0	ng	10	0	20-200 nm			314.15	0.0318319	0	0	0	#DIV/0!	90.9849	149.974
	NEWmassLibrPE-LD.csv																							Sample3_P04_An20_2-11.csv	0	ng	20.14						0.0641095	0
	NEWmassLibrPET.csv																							Sample3_P04_An20_1-10.csv	33.47	ng	10	1.90212				314.15	0.0318319	88.9228	65.0294	33.7904	51.9617
	NEWmassLibrPET.csv																							Sample3_P04_An20_2-11.csv	36.16	ng	20.14						0.0641095	41.136
	NEWmassLibrPPC.csv																							Sample3_P04_An20_1-10.csv	0	ng	10	0				314.15	0.0318319	0	0	0	#DIV/0!
	NEWmassLibrPPC.csv																							Sample3_P04_An20_2-11.csv	0	ng	20.14						0.0641095	0
	NEWmassLibrPS.csv																							Sample3_P04_An20_1-10.csv	0	ng	10	0				314.15	0.0318319	25.2095	25.2095	0	0
	NEWmassLibrPS.csv																							Sample3_P04_An20_2-11.csv	0	ng	20.14						0.0641095	25.2095
	NEWmassLibrPVC.csv																							Sample3_P04_An20_1-10.csv	0	ng	10	0				314.15	0.0318319	0	0	0	#DIV/0!
	NEWmassLibrPVC.csv																							Sample3_P04_An20_2-11.csv	0	ng	20.14						0.0641095	0
	NEWmassLibrTire.csv																							Sample3_P04_An20_1-10.csv	38.79	ng	10	27.4287				314.15	0.0318319	119.469	59.7347	84.4776	141.421
	NEWmassLibrTire.csv																							Sample3_P04_An20_2-11.csv	0	ng	20.14						0.0641095	0
	Procedural Blank
	NEWmassLibrPE-LD.csv																							Blank_P04_PB1_An20_1-16.csv	0	ng	11.96	0				314.15	0.038071	0	0
	NEWmassLibrPE-LD.csv																							Blank_P04_PB1_An20_2-17.csv	0	ng	10.57						0.0336463	0
	NEWmassLibrPE-LD.csv																							Blank_P04_PB1_An20_3-18.csv	0	ng	15.95						0.0507719	0
	NEWmassLibrPE-LD.csv																							Blank_P04_PB1_An20_4-19.csv	0	ng	24.39						0.0776381	0
	NEWmassLibrPE-LD.csv																							Blank_P04_PB1_An20_5-20.csv	0	ng	27.15						0.0864237	0
	NEWmassLibrPET.csv																							Blank_P04_PB1_An20_1-16.csv	7.21	ng	11.96	8.39659				314.15	0.038071	189.383	144.448
	NEWmassLibrPET.csv																							Blank_P04_PB1_An20_2-17.csv	0	ng	10.57						0.0336463	0
	NEWmassLibrPET.csv																							Blank_P04_PB1_An20_3-18.csv	18.43	ng	15.95						0.0507719	362.996
	NEWmassLibrPET.csv																							Blank_P04_PB1_An20_4-19.csv	0	ng	24.39						0.0776381	0
	NEWmassLibrPET.csv																							Blank_P04_PB1_An20_5-20.csv	14.68	ng	27.15						0.0864237	169.861
	NEWmassLibrPPC.csv																							Blank_P04_PB1_An20_1-16.csv	0	ng	11.96	0				314.15	0.038071	0	0
	NEWmassLibrPPC.csv																							Blank_P04_PB1_An20_2-17.csv	0	ng	10.57						0.0336463	0
	NEWmassLibrPPC.csv																							Blank_P04_PB1_An20_3-18.csv	0	ng	15.95						0.0507719	0
	NEWmassLibrPPC.csv																							Blank_P04_PB1_An20_4-19.csv	0	ng	24.39						0.0776381	0
	NEWmassLibrPPC.csv																							Blank_P04_PB1_An20_5-20.csv	0	ng	27.15						0.0864237	0
	NEWmassLibrPS.csv																							Blank_P04_PB1_An20_1-16.csv	8.36	ng	11.96	5.40838				314.15	0.038071	219.59	257.136
	NEWmassLibrPS.csv																							Blank_P04_PB1_An20_2-17.csv	15.86	ng	10.57						0.0336463	471.374
	NEWmassLibrPS.csv																							Blank_P04_PB1_An20_3-18.csv	18.24	ng	15.95						0.0507719	359.254
	NEWmassLibrPS.csv																							Blank_P04_PB1_An20_4-19.csv	5.3	ng	24.39						0.0776381	68.2655
	NEWmassLibrPS.csv																							Blank_P04_PB1_An20_5-20.csv	14.45	ng	27.15						0.0864237	167.2
	NEWmassLibrPVC.csv																							Blank_P04_PB1_An20_1-16.csv	0	ng	11.96	0				314.15	0.038071	0	0
	NEWmassLibrPVC.csv																							Blank_P04_PB1_An20_2-17.csv	0	ng	10.57						0.0336463	0
	NEWmassLibrPVC.csv																							Blank_P04_PB1_An20_3-18.csv	0	ng	15.95						0.0507719	0
	NEWmassLibrPVC.csv																							Blank_P04_PB1_An20_4-19.csv	0	ng	24.39						0.0776381	0
	NEWmassLibrPVC.csv																							Blank_P04_PB1_An20_5-20.csv	0	ng	27.15						0.0864237	0
	NEWmassLibrTire.csv																							Blank_P04_PB1_An20_1-16.csv	0	ng	11.96	0				314.15	0.038071	0	0
	NEWmassLibrTire.csv																							Blank_P04_PB1_An20_2-17.csv	0	ng	10.57						0.0336463	0
	NEWmassLibrTire.csv																							Blank_P04_PB1_An20_3-18.csv	0	ng	15.95						0.0507719	0
	NEWmassLibrTire.csv																							Blank_P04_PB1_An20_4-19.csv	0	ng	24.39						0.0776381	0
	NEWmassLibrTire.csv																							Blank_P04_PB1_An20_5-20.csv	0	ng	27.15						0.0864237	0

[truncated: 11 more sheets: 5, 6, 7, 8, 9, 10, 11, 12, 13, 14, 15]
