# Supplementary material for: Size distribution of nanoplastics and tyre wear particles in human tonsils
Source: Research Square preprint supplement (doi:10.21203/rs.3.rs-6154338/v1), 2025-03-31
Supplement: Supplementary file 3 [file 96df6a4f9c38224c464f83f7.xlsx]

## Sheet: Monte Carlo
		increase %	PET 40 ions	PVC 40 ions	TIRE 40 ions	TRUE PET	True PVC	True TWP	PET	PVC	TWP
		0	1165.7	98.3	9	1165.7	98.3	9	0	0	0
		50	1315	118.2	10.7	1165.7	98.3	9	12.8078	20.2442	18.8889
		100	1397	123.5	11.3	1165.7	98.3	9	19.8422	25.6358	25.5556
		150	1481	101.4	8.8	1165.7	98.3	9	27.0481	3.15361	-2.22222
		200	1526	84.4	7	1165.7	98.3	9	30.9085	-14.1404	-22.2222
		250	1278	73.2	6.5	1165.7	98.3	9	9.6337	-25.5341	-27.7778
		300	1144	62.1	6.1	1165.7	98.3	9	-1.86154	-36.826	-32.2222
		350	1088	61.3	6.1	1165.7	98.3	9	-6.66552	-37.6399	-32.2222
		175	1349			1165.7			15.7245	-100	-100

## Sheet: correlations nano 20+
	Patients	Age	XX/xy	BMI	City/rural	Pacifier	Eat food stored in plastic container	Drink from plastic bottle	Plastic score
		age	(Sex)									Size groups	Tyre	SD	PET	SD	PS	SD	PVC	SD	PP/PPC	SD	PE	SD		sum	PE/PP
	1	31	m	22.6	Rural village	1	2	3			1	20-200 nm	299	111	96	39	98	39	204	77	150	132	244	215		1091	394
	2	15	f	20	City	1	0	-			2	20-200 nm		0		0	10	10	22	22	26	28	35	38		93	61
	3	23	m	23.4	City	1	2	-			3	20-200 nm		0		0		0		0		0	0	0
	4	3,5	m	15.5	City	1	0	3			4	20-200 nm	60	84	79	34		0		0		0	0	0		139
	5	22	f	30.5	City	1	0	2			5	20-200 nm	26	45	58	22	5	8		0		0	0	0		89
	6	44	f	42	City	1	3	0			6	20-200 nm	269	233	116	24	91	8		0	332	61	475	95		1283	807
	7	31	m	27	City	0	2	3			7	20-200 nm	343	64	163	24	233	42	385	58	88	39	244	56		1456	332
	8	3	f	17.4	Rural village	0	2	3			8	20-200 nm	272	57	109	19	104	16	237	54		0	0	0		722
	9	5	m	15.3	City	0	3	2			9	20-200 nm	64	1		0	9	16	41	36		0	0	0		114
	10	5	m	14.9	Rural village	1	2	2			10	20-200 nm	20	29	8	14	8	10		0	14	23	19	32		69	33
	11	25	f	26.2	City	1	3	3			11	20-200 nm		0		0	1	2		0		0	0	0		1
	12	5	f	16.5	City	1	2	0			12	20-200 nm	89	12		0	37	4		0	46	41	58	51		230	104
	13	17	f	25.3	Rural	1	3	3			13	20-200 nm	108	146	52	90	97	123	117	203	3	5	0	0		377	3
	14	24	f	23.7	City	1	3	2			14	20-200 nm	18	19		0	13	5		0	6	10	0	0		37	6
	15	17	f	19.5	Rural	1	3	0			15	20-200 nm		0	11	19	8	12		0		0	0	0		19
																				R2	R
																				0.471	0.686294
	SUMMARY OUTPUT
	Regression Statistics
	Multiple R	0.686292
	R Square	0.470997
	Adjusted R Square	0.430304
	Standard Error	5.42708
	Observations	15
	ANOVA
		df	SS	MS	F	Significance F
	Regression	1	340.906	340.906	11.5745	0.00472293
	Residual	13	382.891	29.4532
	Total	14	723.797
		Coefficients	Standard Error	t Stat	P-value	Lower 95%	Upper 95%	Lower 95.0%	Upper 95.0%
	Intercept	20.119	1.58697	12.6776	1.07838e-08	16.6905	23.5474	16.6905	23.5474
	X Variable 1	0.0353631	0.0103944	3.40213	0.00472293	0.0129074	0.0578188	0.0129074	0.0578188

## Sheet: Spike blanks
Spike_P03_FB_PS_An200_1-7.csv	NEWmassLibrPS.csv	40	1000	0.05	ALG1	***	90.1749	ALG2	***	69.9019	ALG3	***	73.8691	ALG4	***	62.7528	94.36	ng	Cor[ng/ml]	90.2	87.03	73.78	ng		Spike_P03_FB_PS_An200_1-7.csv	***	***	87.03	ng
Spike_P03_FB_PS_An200_2-8.csv	NEWmassLibrPS.csv	40	1000	0.05	ALG1	***	90.6642	ALG2	***	74.5017	ALG3	***	88.5592	ALG4	***	73.4601	173.54	ng	Cor[ng/ml]	90.7	146.76	144.33	ng		Spike_P03_FB_PS_An200_2-8.csv	***	***	146.76	ng
Spike_P03_FB_PS_An200_3-9.csv	NEWmassLibrPS.csv	40	1000	0.05	ALG1	***	88.3287	ALG2	***	68.0201	ALG3	***	82.445	ALG4	***	64.2105	55.5	ng	Cor[ng/ml]	88.3	43.42	41.15	ng		Spike_P03_FB_PS_An200_3-9.csv	***	***	43.42	ng
Spike_P05_FB_PS_An200_1-7.csv	NEWmassLibrPS.csv	40	1000	0.05	ALG1	***	90.0536	ALG2	***	63.9945	ALG3	***	50.5689	ALG4	***	44.2675	76.16	ng	Cor[ng/ml]	90.1	74.87	54.91	ng		Spike_P05_FB_PS_An200_1-7.csv	***	***	74.87	ng
Spike_P05_FB_PS_An200_2-8.csv	NEWmassLibrPS.csv	40	1000	0.05	ALG1	***	87.2304	ALG2	***	69.5619	ALG3	***	70.284	ALG4	***	62.0089	143.42	ng	Cor[ng/ml]	87.2	133.52	115.63	ng		Spike_P05_FB_PS_An200_2-8.csv	***	***	133.52	ng
Spike_P05_FB_PS_An200_3-9.csv	NEWmassLibrPS.csv	40	1000	0.05	ALG1	***	85.4842	ALG2	***	63.4862	ALG3	***	60.6842	ALG4	***	47.7879	44.34	ng	Cor[ng/ml]	85.5	39.37	31.44	ng		Spike_P05_FB_PS_An200_3-9.csv	***	***	39.37	ng
Spike_P06_FB_PS_An200_1-7.csv	NEWmassLibrPS.csv	40	1000	0.05	ALG1	***	89.1703	ALG2	***	67.0084	ALG3	***	66.5013	ALG4	***	55.8981	88.71	ng	Cor[ng/ml]	89.2	82.11	66.53	ng		Spike_P06_FB_PS_An200_1-7.csv	***	***	82.11	ng
Spike_P06_FB_PS_An200_2-8.csv	NEWmassLibrPS.csv	40	1000	0.05	ALG1	***	86.8746	ALG2	***	67.8247	ALG3	***	81.6129	ALG4	***	64.8302	166.02	ng	Cor[ng/ml]	86.9	137.7	130.04	ng		Spike_P06_FB_PS_An200_2-8.csv	***	***	137.7	ng
Spike_P06_FB_PS_An200_3-9.csv	NEWmassLibrPS.csv	40	1000	0.05	ALG1	***	85.6346	ALG2	***	61.619	ALG3	***	71.173	ALG4	***	53.5515	49.95	ng	Cor[ng/ml]	85.6	38.62	34.13	ng		Spike_P06_FB_PS_An200_3-9.csv	***	***	38.62	ng
Spike_P08_FB_PS_An200_1-7.csv	NEWmassLibrPS.csv	40	1000	0.05	ALG1	***	90.7166	ALG2	***	70.2688	ALG3	***	82.4225	ALG4	***	67.7224	101	ng	Cor[ng/ml]	90.7	87.96	79.34	ng		Spike_P08_FB_PS_An200_1-7.csv	***	***	87.96	ng
Spike_P08_FB_PS_An200_2-8.csv	NEWmassLibrPS.csv	40	1000	0.05	ALG1	***	90.3464	ALG2	***	73.4159	ALG3	***	87.861	ALG4	***	72.1934	168.79	ng	Cor[ng/ml]	90.3	142.3	139.06	ng		Spike_P08_FB_PS_An200_2-8.csv	***	***	142.3	ng
Spike_P08_FB_PS_An200_3-9.csv	NEWmassLibrPS.csv	40	1000	0.05	ALG1	***	86.8063	ALG2	***	67.956	ALG3	***	86.9205	ALG4	***	67.8856	57.01	ng	Cor[ng/ml]	86.9	43.07	42.31	ng		Spike_P08_FB_PS_An200_3-9.csv	***	***	43.07	ng
Spike_P09_FB_PS_An200_1-7.csv	NEWmassLibrPS.csv	40	1000	0.05	ALG1	***	90.1218	ALG2	***	70.0426	ALG3	***	81.6574	ALG4	***	68.084	102.01	ng	Cor[ng/ml]	90.1	89.97	80.83	ng		Spike_P09_FB_PS_An200_1-7.csv	***	***	89.97	ng
Spike_P09_FB_PS_An200_2-8.csv	NEWmassLibrPS.csv	40	1000	0.05	ALG1	***	90.7726	ALG2	***	74.4197	ALG3	***	89.9179	ALG4	***	74.0176	175.34	ng	Cor[ng/ml]	90.8	146.47	145.3	ng		Spike_P09_FB_PS_An200_2-8.csv	***	***	146.47	ng
Spike_P09_FB_PS_An200_3-9.csv	NEWmassLibrPS.csv	40	1000	0.05	ALG1	***	89.0047	ALG2	***	68.985	ALG3	***	88.8891	ALG4	***	68.9065	59.17	ng	Cor[ng/ml]	89	44.61	44.53	ng		Spike_P09_FB_PS_An200_3-9.csv	***	***	44.61	ng
																											average	89.1853
																											Recovery/effeciency
																												29.7284

## Sheet: Spiked samples
Spike_P03_P03_PS_GF_1-1.csv	***	***
Spike_P03_P03_PS_GF_2-2.csv	***	***
Spike_P03_P03_PS_GF_3-3.csv	**	***
Spike_P05_P05_PS_GF_1-1.csv	*	***
Spike_P05_P05_PS_GF_2-2.csv	*	***
Spike_P05_P05_PS_GF_3-3.csv	*	***
Spike_P06_P06_PS_GF_1-1.csv	**	***
Spike_P06_P06_PS_GF_2-2.csv	*	***
Spike_P06_P06_PS_GF_3-3.csv	**	***
Spike_P08_P08_PS_GF_1-1.csv	*	***
Spike_P08_P08_PS_GF_2-2.csv	*	***
Spike_P08_P08_PS_GF_3-3.csv	*	***
Spike_P09_P09_PS_GF_1-1.csv	*	***
Spike_P09_P09_PS_GF_2-2.csv	**	***
Spike_P09_P09_PS_GF_3-3.csv	-	***

## Sheet: median calculation
		Plastic polymer (ng/mg)
Sample	Size groups	Tyre	SD	PET	SD	PS	SD	PVC	SD	PP/PPC	SD	PE	SD	Total	SD*
Nr.														Plastics
	20-200 nm	305	113	90	40	74	39	208	79	153	134	249	219		297
														1079
1	200-1200 nm	76	16	17	5	20	5	48	11	0	0	0	0		21
														161
	1.2-2.7μm	0	0	0	0	0	0	0	0	0	0	0	0		0
														0
	>2.7μm	501	33	152	14	149	8	358	35	0	0	0	0		51
														1160
	20-200 nm	0	0	0	0	20	10	23	22	27	29	36	39		54
														106
2	200-1200 nm	0	0	0	0	7	0	0	0	0	0	0	0		0
														7
	1.2-2.7 μm	0	0	0	0	0	0	0	0	0	0	0	0		0
														0
	>2.7 μm	0	0	0	0	0	0	68	59	92	6	161	30		67
														321
	20-200 nm	0	0	54	0	49	0	0	0	0	0	0	0		0
														103
	200-1200 nm	52	15	32	11	33	9	0	0	0	0	0	0		20
3														117
	1.2-2.7 μm	0	0	0	0	0	0	0	0	0	0	0	0		0
														0
	>2.7 μm	0	0	44	0	29	0	0	0	0	0	0	0		0
														73
	20-200 nm	60	84	65	34	25	0	0	0	0	0	0	0		91
														150
4	200-1200 nm	575	90	197	24	181	34	438	63	0	0	0	0		117
														1391
	1.2-2.7 μm	153	47	145	18	0	0	61	105	95	38	162	45		131
														618
	>2.7 μm	847	466	332	284	277	257	509	443	174	302	262	455		926
														2403
	20-200 nm	26	45	58	22	5	7	0	0	0	0	0	0		51
														90
5	200-1200 nm	0	0	63	19	0	0	0	0	0	0	0	0		19
														63
	1.2-2.7 μm	125	77	72	67	19	32	99	61	0	0	0	0		123
														315
	>2.7 μm	1806	604	775	346	524	197	692	1198	0	0	0	0		1399
														3797
	20-200 nm	269	233	97	24	78	8	0	0	332	61	475	95		260
														1251
6	200-1200 nm	5	8	5	1	1	1	0	0	0	0	0	0		8
														10
	1.2-2.7 μm	0	0	0	0	0	0	0	0	0	0	0	0		0
														0
	>2.7 μm	254	53	95	26	84	32	0	0	117	20	173	29		76
														723
	20-200 nm	321	64	163	24	214	42	385	58	88	39	244	56		120
														1415
7	200-1200 nm	55	14	31	10	25	8	0	0	26	13	14	25		34
														151
	1.2-2.7 μm	0	0	0	0	7	7	0	0	0	0	0	0		7
														7
	>2.7 μm	3048	19	1544	34	1797	129	2571	20	505	25	0	0		138
														9465
	20-200 nm	272	57	87	19	81	16	237	54	0	0	0	0		83
														676
8	200-1200 nm	0	0	40	19	15	7	0	0	0	0	0	0		20
														55
	1.2-2.7 μm	0	0	30	51	0	0	0	0	0	0	0	0		51
														30
	>2.7 μm	565	35	162	5	189	16	527	49	0	0	0	0		63
														1443
	20-200 nm	66	1	0	0	18	11	42	37	0	0	0	0		39
														126
	200-1200 nm	13	11	0	0	6	5	8	13	0	0	0	0		18
9														27
	1.2-2.7 μm	0	0	0	0	3	6	0	0	0	0	0	0		6
														3
	>2.7 μm	1196	680	0	0	744	425	1076	606	0	0	0	0		1005
														3016
	20-200 nm	20	18	8	14	9	5	0	0	14	23	19	32		46
10														70
	200-1200 nm	35	7	14	7	8	7	0	0	25	7	27	25		28
														108
	1.2-2.7 μm	204	168	47	81	61	35	77	134	31	54	60	105		261
														481
	>2.7 μm	1794	72	902	82	759	10	2128	92	648	9	1665	124		189
														7896
	20-200 nm	23	0	0	0	14	2	0	0	0	0	0	0		2
														37
	200-1200 nm	42	3	32	15	17	8	0	0	12	10	10	18		27
11														113
	1.2-2.7 μm	0	0	0	0	3	5	0	0	0	0	0	0		5
														3
	>2.7 μm	550	35	233	28	196	19	347	331	255	12	501	57		340
														2083
	20-200 nm	89	12	0	0	37	4	0	0	46	41	58	51		67
														230
12	200-1200 nm	43	1	20	2	15	1	0	0	27	1	41	2		4
														145
	1.2-2.7 μm	158	273	86	149	18	16	0	0	45	43	27	46		318
														334
	>2.7 μm	638	198	197	188	232	68	497	173	262	81	522	173		382
														2349
	20-200 nm	99	130	52	90	81	123	117	203	3	5	0	0		285
														352
13	200-1200 nm	0	0	7	0	1	1	0	0	0	0	0	0		1
														8
	1.2-2.7 μm	127	110	54	47	54	32	98	85	90	90	125	118		211
														548
	>2.7 μm	848	38	378	25	387	7	905	132	183	17	336	295		327
														3037
	20-200 nm	16	9	10	0	5	2	0	0	6	10	0	0		13
														36
	200-1200 nm	17	16	7	1	10	4	0	0	21	11	16	16		26
14														71
	1.2-2.7 μm	0	0	0	0	6	11	10	18	0	0	5	9		23
														22
	>2.7 μm	250	98	50	38	158	21	292	268	108	67	165	87		309
														1023
	20-200 nm	0	0	11	19	8	12	0	0	0	0	0	0		23
														19
15	200-1200 nm	41	31	6	9	16	12	0	0	34	34	38	35		60
														134
	1.2-2.7 μm	7	6	0	0	2	4	0	0	0	0	0	0		7
														9
	>2.7 μm	112	103	0	0	71	62	0	0	16	28	27	47		132
														226
* The square root of all the calculated standard deviations.																	median
																	20-200 nm
																		126
																	200-1200 nm
																		108
																	1.2-2.7 μm
																		9
																	>2.7 μm
																		2083
